# Supplementary material for: Genetic analysis of grain yield and related traits of extra-early orange maize inbred lines and their hybrids under drought and rain-fed conditions
Source: Front Plant Sci. 2024 Nov 29;15:1463924. doi: 10.3389/fpls.2024.1463924 (PMC11637839; doi:10.3389/fpls.2024.1463924)
Supplement: Supplementary file 1 [file DataSheet1.xlsx]

## Sheet: Table S1
Table S1: Pedigree information of the 41 inbreds used for the Line-by-Tester crosses to generate testcross hybrids
S/N	Designation	Pedigree
1	TZEEIOR 142	2009 TZEE-0R1 STR S9 46-1/2-1/3-2/2-3/3-2/2
2	TZEEIOR 202	2009 TZEE-0R1 STR S9 68-3/3-1/3-1/2-3/4-1/1
3	TZEEIOR 205	2009 TZEE-0R1 STR S9 74-1/2-1/3-1/2-2/3-1/1
4	TZEEIOR 209	2009 TZEE-ORI STR S9 78-1/1-2/3-2/2-1/1-1/1
5	TZEEIOR 221	2009 TZEE-0R1 STR S9 80-3/3-1/3-1/1-1/6-1/1
6	TZEEIOR 24	2009 TZEE-0R1 STR S9 3-3/3-2/3-1/3-2/3-1/1
7	TZEEIOR 28	2009 TZEE-0R1 STR S9 3-3/3-3/3-4/4-2/2-1/1
8	TZEEIOR 41	2009 TZEE-0R1 STR S9 8-3/3-2/3-2/5-1/7-1/1
9	TZEEIOR 45	2009 TZEE-0R1 STR S9 8-3/3-2/3-4/5-4/4-2/2
10	TZEEIOR 289	(TZdEEI 12 x TZEEI 95)S8 Inb 50-1/1-1/1-1/2-2/2-1/1
11	TZEEIOR 290	(TZdEEI 12 x TZEEI 95)S8 Inb 50-1/1-1/1-2/2-2/2-1/1
12	TZEEIOR 305	(TZdEEI 12 x TZEEI 95)S8 Inb 82-1/1-1/1-3/3-1/1-1/1
13	TZEEIOR 314	(TZdEEI 12 x TZEEI 95)S8 Inb 106-1/1-2/2-1/2-2/2-1/1
14	TZEEIOR 321	(TZdEEI 12 x TZEEI 95)S8 Inb 110-1/1-2/2-2/2-1/1-1/1
15	TZEEIOR 346	(TZdEEI 12 x TZEEI 95)S8 Inb 147-1/1-1/1-2/2-1/2-1/1
16	TZEEIOR 349	(TZdEEI 12 x TZEEI 95)S8 Inb 161-1/1-2/2-1/2-3/3-1/1
17	TZEEIOR 365	(TZdEEI 12 x TZEEI 95)S8 Inb 181-1/1-2/2-2/2-1/1-1/1
18	TZEEIOR 381	(TZdEEI 12 x TZEEI 95)S8 Inb 235-1/1-1/1-1/2-2/2-1/1
19	TZEEIOR 384	(TZdEEI 12 x TZEEI 95)S8 Inb 246-1/1-1/1-1/2-1/1-1/1
20	TZEEIOR 396	(TZdEEI 12 x TZEEI 95)S8 Inb 334-1/1-1/1-2/2-3/3-1/1
21	TZEEIOR 458	(TZdEEI 7 x TZdEEI 12)S8 Inb 54-1/1-1/1-1/3-2/2-1/1
22	TZEEIOR 479	(TZdEEI 7 x TZdEEI 12)S8 Inb 72-2/2-1/1-1/2-1/1-1/1
23	TZEEIOR 486	(TZdEEI 7 x TZdEEI 12)S8 Inb 91-1/1-1/1-1/4-1/2-1/1
24	TZEEIOR 500	(TZdEEI 7 x TZdEEI 12)S8 Inb 123-1/2-1/1-1/2-1/1-1/1
25	TZEEIOR 509	(TZdEEI 7 x TZdEEI 12)S8 Inb 125-2/2-1/1-3/3-2/2-1/1
26	TZEEIOR 510	(TZdEEI 7 x TZdEEI 12)S8 Inb 134-1/1-1/1-1/2-1/1-1/1
27	TZEEIOR 513	(TZdEEI 7 x TZdEEI 12)S8 Inb 140-1/2-1/1-2/3-1/1-1/1
28	TZEEIOR 515	(TZdEEI 7 x TZdEEI 12)S8 Inb 140-2/2-1/1-1/2-1/1-1/1
29	TZEEIOR 523	(TZdEEI 7 x TZdEEI 12)S8 Inb 142-2/2-1/1-2/3-2/2-1/1
30	TZEEIOR 525	(TZdEEI 7 x TZdEEI 12)S8 Inb 144-1/2-1/1-1/1-1/2-1/1
31	TZEEIOR 526	(TZdEEI 7 x TZdEEI 12)S8 Inb 144-1/2-1/1-1/1-2/2-1/1
32	TZEEIOR 536	(TZdEEI 7 x TZdEEI 12)S8 Inb 154-1/1-1/1-2/4-1/1-1/1
33	TZEEIOR 540	(TZdEEI 7 x TZdEEI 12)S8 Inb 162-2/2-1/1-1/3-1/2-1/1
34	TZEEIOR 542	(TZdEEI 7 x TZdEEI 12)S8 Inb 163-1/1-1/1-2/3-1/2-1/1
35	TZEEIOR 546	(TZdEEI 7 x TZdEEI 12)S8 Inb 168-1/1-1/1-1/1-1/2-1/1
36	TZEEIOR 548	(TZdEEI 7 x TZdEEI 12)S8 Inb 171-1/1-1/1-1/3-1/2-1/1
37	TZEEIOR 197 (Tester)	2009 TZEE-ORI STR S9 68-1/3-2/3-2/2-1/3-1/1
38	TZEEIOR 97(Tester)	2009 TZEE-ORI STR S9 15-2/2-1/2-1/3-3/3-1/1
39	TZEEIOR 9A (Tester)
40	TZEEIOR 30 (Tester)	2009 TZEE-ORI STR S9 5-1/1-2/3-1/2-2/2-1/1
41	TZEEIOR 249 (Tester)	2009 TZEE-ORI STR S9 9100-3/3-1/3-1/1-1/3-1/3

## Sheet: Table S2
Table S2: Mean square from combined analysis of variance of 180 hybrids evaluated under managed drought and rain-fed conditions for two seasons (2022 and 2023)
Source	DF	GY	DP	DS	ASI	PHT	EHT	PASP	EASP	HCV	EPP
Environment ( E)	3	441366346.25***	52.53***	18.51***	282.43***	15465.32***	966.81***	64.52***	23.75***	32.83***	3.8***
REP(E)	4	7302827.18***	3.27ns	17.68***	11.21***	1311.68***	492.74***	3.85***	10.27***	2.88*	0.22***
GENOTYPES	179	4232933.5***	10.55***	22.22***	2.12***	707.91***	338.49***	2.24***	1.39***	9.32***	0.05***
LINE (GCA LIine)	35	8092985.85***	19.6***	53.66***	3.84***	1518.29***	639.08***	2.63***	1.92***	10.82***	0.09***
TESTER(GCA Tester)	4	24719557.89***	133.9***	173.54***	7.38***	9129.81***	4663.73***	18.97***	6.81***	261.99***	0.23***
LINE × TESTER(SCA Line × Tester)	140	2683214.08***	4.76***	10.03***	1.54***	264.86***	139.8***	1.67***	1.11***	1.73***	0.03***
GENOTYPES × E	537	1195828.02***	2.01ns	4.07ns	1.47***	175.78***	66.15ns	1.05***	1.08***	1.14***	0.02***
LINE × E	105	1635309.09***	2.19ns	4.58ns	2.86***	248.86***	73.3ns	1.18***	1.59***	1.37***	0.03***
TESTER × E	12	5850589.03***	8.39***	18.84***	1.91*	1252.99***	205.94***	9.75***	3.05***	10.48***	0.17***
LINE × TESTER × E	420	952964.58ns	1.78ns	3.52ns	1.12ns	126.73ns	60.37ns	0.77ns	0.89ns	0.81ns	0.02ns
Residuals	612	960827.64	1.74	3.71	1.04	132.22	60.38	0.9	0.86	0.79	0.02***
GY= grain yield; ASI= anthesis-silking interval; PHT= plant height; EHT= ear height; PASP= plant aspect; EASP= ear aspect; EPP= ear per plant; HCV= husk cover; DP= days to pollen; DS= days to silking, STGC=stay green characteristic

## Sheet: Table S3
Table S3: General combining ability (GCA) effects of grain yield and other traits of 36 extra-early maturing orange maize inbred lines and 5 elite inbred testers under managed drought stress at Ikenne during the period 2021-2022
Inbred lines	GY	DP	DS	ASI	PHT	EHT	PASP	EASP	HCV	STGC	EPP
TZEEIOR 142	-121.34ns	1.23ns	2.65ns	1.21*	6.33ns	5.39ns	-0.13ns	0.12ns	-0.36ns	-0.12ns	-0.05ns
TZEEIOR 202	-339.21ns	0.89ns	1.94ns	0.95ns	15.29*	5.82ns	-0.35ns	-0.09ns	-0.84ns	-0.45ns	0.04ns
TZEEIOR 205	159.59ns	0.28ns	1.07ns	0.59ns	14.33ns	16.15***	-0.25ns	-0.16ns	-0.13ns	-0.12ns	0.03ns
TZEEIOR 209	-526.21ns	1.05ns	1.57ns	0.3ns	4.83ns	7.05ns	0.21ns	0.62ns	-0.33ns	-0.06ns	-0.03ns
TZEEIOR 221	-618.26ns	1.35ns	2.84ns	1.4*	1.06ns	3.25ns	0.48ns	0.52ns	-0.72ns	0.41ns	-0.08ns
TZEEIOR 24	-510.18ns	1.32ns	1.56ns	-0.02ns	7.87ns	2.52ns	0.25ns	0.49ns	-0.65ns	0.01ns	-0.05ns
TZEEIOR 28	-670.26ns	0.54ns	1.71ns	0.9ns	17.03*	-0.17ns	0.23ns	0.6ns	-0.74ns	-0.69*	-0.13ns
TZEEIOR 289	221.52ns	0.09ns	0.07ns	0.2ns	-3.28ns	-2.27ns	-0.03ns	-0.11ns	0.85ns	0.05ns	0.09ns
TZEEIOR 290	127.47ns	0.03ns	-0.04ns	0.14ns	-6.86ns	-0.52ns	0.21ns	-0.09ns	0.84ns	0.23ns	0.03ns
TZEEIOR 305	10.18ns	0.2ns	0.27ns	0.11ns	-3.57ns	-1.13ns	0.22ns	0.05ns	0.3ns	0.62ns	-0.03ns
TZEEIOR 314	581.85ns	-1.16ns	-1.95ns	-0.94ns	0.12ns	-0.8ns	-0.19ns	-0.58ns	0.81ns	-0.49ns	0.1ns
TZEEIOR 321	377.82ns	-1.47ns	-1.81ns	-0.28ns	4.97ns	-0.01ns	-0.21ns	-0.55ns	-0.13ns	-0.2ns	0.05ns
TZEEIOR 346	202.31ns	0.03ns	-0.03ns	-0.09ns	-2.69ns	-2.77ns	-0.43ns	0.06ns	0.07ns	-0.25ns	0.03ns
TZEEIOR 349	-567.89ns	1.07ns	1.08ns	-0.2ns	-18.28*	-8.4ns	0.89**	0.54ns	0.36ns	0.48ns	-0.07ns
TZEEIOR 365	-36.8ns	0.18ns	0.15ns	0.25ns	-8.6ns	-1.84ns	0.21ns	-0.04ns	-0.97ns	0.65ns	0ns
TZEEIOR 381	-27.75ns	-0.07ns	-0.66ns	-0.49ns	-4.74ns	-0.69ns	0.11ns	0.29ns	0.67ns	-0.17ns	-0.07ns
TZEEIOR 384	145.42ns	-1.69ns	-2.72ns	-0.44ns	3.29ns	-1.47ns	-0.28ns	-0.37ns	0.64ns	0.33ns	-0.03ns
TZEEIOR 396	-97.77ns	0.73ns	-0.03ns	-0.65ns	-7.49ns	-2.19ns	0.36ns	0.03ns	0.46ns	-0.21ns	-0.02ns
TZEEIOR 41	-646.68ns	0.95ns	2.12ns	0.9ns	9.15ns	-0.02ns	0.15ns	0.39ns	-0.95ns	-0.51ns	-0.14ns
TZEEIOR 45	-633.9ns	0.34ns	1.19ns	0.85ns	4.14ns	-4.65ns	0.49ns	0.69ns	-0.79ns	0.03ns	-0.12ns
TZEEIOR 458	631.65ns	-0.67ns	-1.53ns	-0.7ns	0.65ns	0.89ns	-0.6ns	-0.58ns	0.15ns	-0.3ns	0.09ns
TZEEIOR 479	578.03ns	-1.61ns	-3.04*	-0.85ns	4.43ns	1.76ns	-0.41ns	-0.5ns	0.1ns	0.17ns	0.11ns
TZEEIOR 486	-321.58ns	0.54ns	1.18ns	0.22ns	-1.43ns	-0.71ns	0.05ns	0.34ns	-0.21ns	-0.26ns	-0.08ns
TZEEIOR 500	-114.57ns	-1.36ns	-1.51ns	-0.14ns	-3.64ns	1.27ns	0.09ns	0.4ns	0.32ns	0.63ns	0.01ns
TZEEIOR 509	634.67ns	-0.95ns	-1.86ns	-0.54ns	-0.95ns	1.53ns	-0.52ns	-0.53ns	0.2ns	-0.02ns	0.08ns
TZEEIOR 510	899.6*	-0.34ns	-0.74ns	-0.68ns	5.67ns	1.86ns	-0.8*	-1*	-0.82ns	-0.75*	0.16*
TZEEIOR 513	206.6ns	-0.96ns	-0.97ns	-0.19ns	-5.44ns	-4.28ns	0.18ns	-0.06ns	-0.01ns	0.46ns	0.05ns
TZEEIOR 515	5.83ns	-1.35ns	-1.86ns	-0.5ns	2.52ns	-3.43ns	-0.28ns	0.09ns	-0.05ns	0.2ns	0.01ns
TZEEIOR 523	-20.73ns	-0.38ns	-0.83ns	-0.33ns	-4.85ns	0.64ns	0.15ns	0.25ns	0.05ns	0.11ns	0.06ns
TZEEIOR 525	12.68ns	0.06ns	0.06ns	-0.05ns	-7.83ns	-6.07ns	0.23ns	-0.03ns	-0.08ns	0.06ns	-0.07ns
TZEEIOR 526	247.29ns	-0.59ns	-0.48ns	0.02ns	-2.74ns	-4.17ns	-0.15ns	-0.35ns	-0.58ns	-0.09ns	0.01ns
TZEEIOR 536	212.56ns	0.52ns	0.71ns	0.2ns	-10.74ns	3.15ns	0.36ns	-0.24ns	0.75ns	-0.23ns	0.03ns
TZEEIOR 540	510.51ns	-0.89ns	-1.68ns	-0.46ns	10.52ns	6.36ns	-0.36ns	-0.65ns	0.61ns	0.19ns	0.11ns
TZEEIOR 542	-211.75ns	0.39ns	0.03ns	-0.3ns	-2.52ns	-2.82ns	0.11ns	0.23ns	0.42ns	0.26ns	-0.13ns
TZEEIOR 546	-82.76ns	1.18ns	1.13ns	-0.24ns	-4.32ns	-2.86ns	-0.07ns	0.21ns	0.35ns	-0.4ns	0.05ns
TZEEIOR 548	-232.65ns	0.47ns	0.45ns	-0.16ns	-10.41ns	-6.28ns	-0.01ns	0.05ns	0.33ns	0.26ns	-0.04ns
TZEEIOR 249	121.17ns	-0.71ns	-1.02ns	-0.25ns	4.93ns	2.38ns	-0.31ns	-0.14ns	0.67ns	-0.27ns	0.06ns
TZEEIOR 197	90.96ns	-0.17ns	0.24ns	0.14ns	5.3ns	0.31ns	-0.18ns	-0.14ns	-0.97ns	-0.07ns	0.04ns
TZEEIOR 30	57.23ns	0.25ns	0.05ns	-0.03ns	-1.01ns	-5.25ns	-0.06ns	-0.04ns	-0.74ns	-0.12ns	-0.02ns
TZEEIOR 9A	-285.25ns	-0.82ns	-0.95ns	-0.12ns	-7.53ns	-2.33ns	0.36ns	0.32ns	0.54ns	0.69ns	-0.02ns
TZEEIOR 97	13.86ns	1.44ns	1.69ns	0.27ns	-1.43ns	4.91ns	0.18ns	0ns	0.48ns	-0.25ns	-0.05ns
GY= grain yield; ASI= anthesis-silking interval; PHT= plant height; EHT= ear height; PASP= plant aspect; EASP= ear aspect; EPP= ear per plant; HCV= husk cover; DP= days to pollen; DS= days to silking, STGC=stay green characteristic

## Sheet: Table S4
Table S4: General combining ability (GCA) effects of grain yield and other traits of 36 extra-early maturing orange maize inbred lines and 5 elite inbred testers evaluated under well-watered conditions at Ikenne in 2022 and 2023 main season
Inbred lines	GY	DP	DS	ASI	PHT	EHT	PASP	EASP	HCV	EPP
TZEEIOR 142	190.96ns	1.99***	2.65*	0.08ns	14.12*	5.64ns	-0.05ns	-0.03ns	0.24ns	0.01ns
TZEEIOR 202	9.8ns	0.92ns	1.49ns	-0.07ns	9.29ns	4.26ns	-0.21ns	-0.33ns	-0.99ns	0.05ns
TZEEIOR 205	277.39ns	0.47ns	1.28ns	0.23ns	13.14*	13.88***	-0.44ns	-0.31ns	0.41ns	-0.01ns
TZEEIOR 209	-178.79ns	0.21ns	0.36ns	-0.02ns	3.98ns	5.89ns	-0.17ns	-0.07ns	-0.61ns	0.04ns
TZEEIOR 221	10.94ns	0.63ns	0.99ns	-0.27ns	5.83ns	4.22ns	0.04ns	0.06ns	-0.64ns	0.02ns
TZEEIOR 24	-1241.68*	0.92ns	1.63ns	0.18ns	8.44ns	1.54ns	0.62ns	0.05ns	-0.21ns	0.02ns
TZEEIOR 28	-1857.97***	0.28ns	0.99ns	0.18ns	6.75ns	-2.98ns	0.68*	0.13ns	-0.58ns	-0.11***
TZEEIOR 289	686.62ns	-0.21ns	-0.34ns	-0.17ns	-4.62ns	-2.59ns	-0.03ns	-0.21ns	0.95ns	0.02ns
TZEEIOR 290	423.89ns	-0.19ns	-0.39ns	-0.22ns	-3.64ns	-1.08ns	0.23ns	-0.07ns	1.12ns	-0.01ns
TZEEIOR 305	-137.83ns	0.39ns	0.29ns	-0.12ns	-10ns	-4.91ns	-0.03ns	0.06ns	-0.15ns	-0.01ns
TZEEIOR 314	220.87ns	-1.11ns	-0.98ns	-0.12ns	-5.61ns	-0.99ns	0.17ns	-0.01ns	1.01ns	0.01ns
TZEEIOR 321	-241.81ns	-0.57ns	-0.75ns	-0.02ns	-4.77ns	1.2ns	-0.22ns	0.33ns	0.42ns	0.01ns
TZEEIOR 346	-150.15ns	-0.72ns	-0.95ns	-0.22ns	-3.42ns	-0.77ns	-0.17ns	0.11ns	0.47ns	-0.01ns
TZEEIOR 349	-341.82ns	0.07ns	-0.14ns	-0.17ns	-5.17ns	-1.38ns	-0.1ns	-0.09ns	-0.48ns	-0.02ns
TZEEIOR 365	232.16ns	-0.11ns	-0.4ns	-0.02ns	0.41ns	1.01ns	-0.1ns	-0.29ns	-0.99ns	0.01ns
TZEEIOR 381	-126.8ns	0.12ns	-0.55ns	0.28ns	-5.45ns	-2.12ns	0.15ns	0.49*	0.58ns	-0.04ns
TZEEIOR 384	288.52ns	-1.07ns	-1.85ns	0.33ns	-1.39ns	-0.55ns	-0.29ns	-0.03ns	-0.16ns	0.02ns
TZEEIOR 396	154.82ns	0.42ns	-0.1ns	-0.07ns	-6.09ns	-3.02ns	-0.11ns	-0.21ns	0.46ns	0.02ns
TZEEIOR 41	-1513*	0.05ns	0.95ns	0.33ns	4.95ns	-2.1ns	0.71*	0.18ns	0.2ns	-0.05ns
TZEEIOR 45	-1264.99*	0.36ns	1.09ns	0.13ns	6.21ns	-0.8ns	0.36ns	0.01ns	-0.63ns	-0.06ns
TZEEIOR 458	43.02ns	-0.29ns	-0.73ns	0.13ns	-2.89ns	-3.57ns	0.12ns	0.22ns	0.26ns	-0.01ns
TZEEIOR 479	-10.6ns	-0.84ns	-1.85ns	0.43*	-2.41ns	0.46ns	0.38ns	0.05ns	-0.25ns	0ns
TZEEIOR 486	-43.38ns	0.06ns	0.68ns	-0.07ns	0.03ns	-1.19ns	-0.46ns	-0.06ns	-0.62ns	-0.04ns
TZEEIOR 500	-53.06ns	-1.22ns	-1.75ns	0.13ns	-6.07ns	-0.22ns	0.55ns	-0.04ns	0.44ns	0.04ns
TZEEIOR 509	414.67ns	-0.28ns	-0.51ns	-0.27ns	-4.28ns	-0.19ns	-0.24ns	0.24ns	0.15ns	-0.01ns
TZEEIOR 510	745.1ns	-0.18ns	-0.01ns	-0.32ns	3.06ns	2.3ns	0ns	0.16ns	-0.6ns	0.01ns
TZEEIOR 513	79.64ns	-0.51ns	-0.89ns	-0.02ns	-6.95ns	-4.15ns	0.01ns	0.1ns	0.39ns	0.01ns
TZEEIOR 515	531.63ns	-0.87ns	-1.41ns	0.08ns	3.15ns	-2.01ns	-0.49ns	0.2ns	-0.47ns	0.02ns
TZEEIOR 523	269.85ns	-0.19ns	-0.56ns	0.03ns	-0.92ns	5.19ns	0.36ns	-0.02ns	0.65ns	0.03ns
TZEEIOR 525	-23.95ns	-0.05ns	0.46ns	-0.02ns	-1.38ns	-6.12ns	-0.14ns	0.21ns	-0.98ns	0ns
TZEEIOR 526	78.69ns	-0.14ns	0.56ns	0.13ns	-8.08ns	-6.67ns	-0.19ns	-0.02ns	-0.72ns	0ns
TZEEIOR 536	625.07ns	-0.1ns	-0.01ns	-0.12ns	-2.76ns	5.18ns	-0.07ns	-0.05ns	0.53ns	0.04ns
TZEEIOR 540	595.71ns	-0.11ns	-0.6ns	0.03ns	3.7ns	-0.35ns	-0.29ns	-0.26ns	0.25ns	0.01ns
TZEEIOR 542	640.16ns	0.48ns	0.44ns	-0.17ns	7.08ns	0.92ns	-0.18ns	-0.28ns	0.4ns	-0.01ns
TZEEIOR 546	814.17ns	0.82ns	0.44ns	0.13ns	4.43ns	3.19ns	-0.59ns	-0.3ns	0.08ns	-0.02ns
TZEEIOR 548	-59.48ns	0.38ns	0.37ns	-0.32ns	-6.38ns	-6.04ns	0.1ns	0.02ns	0.12ns	-0.01ns
TZEEIOR 249	-260.7ns	-0.16ns	-0.02ns	-0.12ns	0.39ns	0.15ns	0.41ns	0.09ns	1.69ns	-0.02ns
TZEEIOR 197	688.5ns	-0.1ns	0.28ns	-0.02ns	6.05ns	0.8ns	-0.59ns	-0.3ns	-1.42ns	0.05ns
TZEEIOR 30	-180.72ns	-0.14ns	-0.55ns	0.3ns	-5.46ns	-5.53ns	0.35ns	0.07ns	-0.86ns	-0.02ns
TZEEIOR 9A	-544.8ns	-0.5ns	-0.53ns	-0.19ns	-9.41ns	-1.75ns	0.24ns	0.13ns	0.31ns	0ns
TZEEIOR 97	309.99ns	0.87ns	0.8ns	0.03ns	8.75ns	6.49ns	-0.42ns	0.01ns	0.28ns	0ns
GY= grain yield; ASI= anthesis-silking interval; PHT= plant height; EHT= ear height; PASP= plant aspect; EASP= ear aspect; EPP= ear per plant; HCV= husk cover; DP= days to pollen; DS= days to silking

## Sheet: Table S5
Table S5: Performance of testcross hybrids for grain yield and other agronomic parameters evaluated for two seasons under managed drought and rain-fed conditions
s/n	Genotype	Grain Yield (Kg/ha)			Days to Pollen			Days to Silking			Anthesis-Silking Interval			Plant Height			Ear Height			Husk Cover			Ears per Plant			Plant Aspect			Ear Aspect
		Rain-fed	Drought	Reduction (%)	Rain-fed	Drought	Reduction (%)	Rain-fed	Drought	Reduction (%)	Rain-fed	Drought	Reduction (%)	Rain-fed	Drought	Reduction (%)	Rain-fed	Drought	Reduction (%)	Rain-fed	Drought	Reduction (%)	Rain-fed	Drought	Reduction (%)	Rain-fed	Drought	Reduction (%)	Rain-fed	Drought	Reduction (%)
1	TZEEIOR 346 × TZEEIOR 9 A	4927.72	2277.42	53.78	48.96	47.71	2.57	48.41	47.7	1.46	0.5	0.5	0	162.68	144.99	10.87	81.2	78.2	3.7	4.03	4.45	-10.49	0.92	0.73	19.82	4.66	5.3	-13.71	5	5.25	-5
2	TZEEIOR 321 × TZEEIOR 9 A	4354.65	1325.1	69.57	50.84	49.14	3.34	50.9	51.88	-1.92	0.5	3.06	-512	159.05	135.96	14.52	80.33	71.63	10.83	4	4.5	-12.49	0.93	0.61	33.9	4.54	6.36	-40.01	4.5	6	-33.33
3	TZEEIOR 314 × TZEEIOR 9 A	5066.15	1946.98	61.57	49.49	48.3	2.41	49.25	48.49	1.53	0.25	0.53	-112	172.58	141.24	18.16	87.96	75.07	14.66	4.96	4.71	5.02	0.92	0.79	14.62	4.51	5.66	-25.34	4.75	5.25	-10.53
4	TZEEIOR 396 × TZEEIOR 9 A	5301.57	2121.11	59.99	50.89	48.91	3.89	50.74	48.55	4.31	0	0.74	-0.74	165.4	140.07	15.31	80.01	72.26	9.68	4.76	5	-5.12	0.94	0.65	31.22	4.57	6.12	-34.04	4.75	5.25	-10.53
5	TZEEIOR 384 ×TZEEIOR 9 A	4850.13	1802.37	62.84	49.36	47.79	3.17	48.58	48.59	-0.03	0.75	1.79	-138.67	162.16	131.62	18.83	79.75	69.14	13.3	4.23	4.95	-17.08	0.94	0.63	32.7	4.78	5.71	-19.37	4.75	6	-26.32
6	TZEEIOR 289 × TZEEIOR 9 A	5423.94	2080.29	61.65	51.56	49.62	3.77	51.79	50.34	2.8	0.25	0.75	-200	163.33	137.17	16.02	80.75	74.89	7.25	5.03	6.02	-19.56	0.99	0.8	19.22	4.27	6.08	-42.3	4.75	5.25	-10.53
7	TZEEIOR 365 × TZEEIOR 9 A	4960.96	1853.71	62.63	50.07	47.62	4.88	50.71	49.64	2.12	0.5	2.22	-344	169.59	138.06	18.6	79.28	73.56	7.22	2.97	3.49	-17.7	0.83	0.75	9.71	4.97	5.57	-12.2	4.5	5.5	-22.22
8	TZEEIOR 290 × TZEEIOR 9 A	4894.5	2012.07	58.89	50.79	50.38	0.79	50.68	51.99	-2.58	0	1.69	-1.69	165.21	127.52	22.81	79.01	70.25	11.08	5.94	5.31	10.58	0.91	0.73	20.38	5.47	6.12	-11.98	4.25	5.5	-29.41
9	TZEEIOR 515 × TZEEIOR 9 A	4524.61	2124.94	53.04	49.57	47.21	4.76	49.06	48.74	0.66	0.5	2.19	-338	161.19	138.76	13.91	71.39	67.78	5.06	4.01	5.24	-30.46	0.86	0.67	21.96	5.29	5.79	-9.55	5.5	5.5	0
10	TZEEIOR 458 × TZEEIOR 9 A	4969	2833.6	42.97	50.04	46.69	6.71	49.69	46.42	6.58	0.25	0.53	-112	164.32	152.5	7.19	75.69	80.74	-6.67	5.02	5.55	-10.55	0.94	0.78	16.84	4.74	4.68	1.36	5.25	4.5	14.29
11	TZEEIOR 479 × TZEEIOR 9 A	5092.78	2722.54	46.54	49.46	48.5	1.95	48.36	48.22	0.3	1	0.73	27	167.05	140.46	15.92	82.18	70.06	14.75	4.21	4.58	-8.87	0.95	0.84	11.38	5.04	5.41	-7.43	5.25	4.5	14.29
12	TZEEIOR 513 × TZEEIOR 9 A	5210.66	1571.96	69.83	49.3	47.3	4.06	49.02	49.79	-1.57	0.25	2.45	-880	170.39	135.92	20.23	77.65	66.76	14.02	6.26	4.71	24.79	0.97	0.72	25.66	4.26	6.05	-41.86	5.5	6	-9.09
13	TZEEIOR 509 × TZEEIOR 9 A	4587.43	1860.69	59.44	50.71	48.45	4.46	50.47	48.72	3.47	0.25	0.94	-276	164.8	138.79	15.78	78.44	81.6	-4.03	5.21	5.26	-0.81	0.88	0.67	23.91	4.69	5.23	-11.48	5.25	5.25	0
14	TZEEIOR 540 × TZEEIOR 9 A	4577.73	2448.8	46.51	50.22	48	4.43	49.77	47.96	3.64	0.5	0.69	-38	169.57	151.64	10.58	80.94	80	1.15	3.98	5.5	-38.17	0.76	0.84	-10.71	4.26	5.39	-26.61	4.75	5	-5.26
15	TZEEIOR 548 × TZEEIOR 9 A	5044.23	1858.75	63.15	50.3	48.93	2.72	49.92		-0.62	0.5	1.44	-188	159.52	137.03	14.1	73.03	72.34	0.95	4.7	4.76	-1.23	0.93	0.65	30.51	4.71	5.36	-13.7	5	5	0
16	TZEEIOR 523 × TZEEIOR 9 A	5497.54	1260.8	77.07	49.59	49.69	-0.21	49.11	51.64	-5.14	0.5	2	-300	165.26	118.62	28.22	86.06	60.56	29.63	5.5	4.43	19.42	0.99	0.63	36.59	5.22	6.93	-32.77	5	6.25	-25
17	TZEEIOR 542 TZEEIOR 9 A	4913.74	1336.52	72.8	51.04	50.64	0.79	50.57	50.68	-0.21	0.5	0.01	98	178.12	125.26	29.68	82.74	61.62	25.52	5.27	5.29	-0.27	0.82	0.59	28.7	4.75	6.3	-32.5	5	5.75	-15
18	TZEEIOR 500 × TZEEIOR 9 A	4316.87	1708.1	60.43	49.52	47.72	3.62	49	50.11	-2.26	0.5	2.3	-360	159.47	122.26	23.33	77.28	63.19	18.24	4.55	4.43	2.62	0.97	0.71	27.23	5.23	5.87	-12.08	4.5	5.5	-22.22
19	TZEEIOR 202 × TZEEIOR 9 A	6714.28	2098.17	68.75	50.39	49.5	1.77	50.44	49.5	1.86	0.5	0.51	-2	186.25	162.01	13.01	89.68	80.51	10.22	3.3	3.71	-12.6	1.05	0.8	23.61	4.18	4.86	-16.15	4.25	4.75	-11.76
20	TZEEIOR 205 × TZEEIOR 9 A	5347.56	2121.72	60.32	51.03	49.18	3.64	51.19	51.11	0.16	0.25	1.95	-680	179.22	152.77	14.76	92.71	87.41	5.71	5.04	4.5	10.83	0.91	0.78	14.6	4.2	5.16	-22.87	4.5	4.75	-5.56
21	TZEEIOR 24 × TZEEIOR 9 A	5379.79	1602.87	70.21	49.9	49.86	0.09	49.63	49.82	-0.38	0.25	0.34	-36	182.64	148.87	18.49	87.33	76.3	12.63	3.7	3.27	11.55	0.98	0.65	34.07	4.5	5.37	-19.22	4.5	5.25	-16.67
22	TZEEIOR 28 × TZEEIOR 9 A	5341.02	2501.02	53.17	48.47	46.94	3.15	48.3	47.86	0.92	0.25	0.98	-292	175.45	170.61	2.76	79.09	80.93	-2.32	3.5	3.72	-6.45	0.98	0.78	21.03	4.67	4.54	2.68	4.75	4.25	10.53
23	TZEEIOR 41 × TZEEEIOR 9 A	5083.29	2029.03	60.08	49.06	48.06	2.05	49.02	48.85	0.35	0.5	0.53	-6	181.75	159.85	12.05	86.53	82.34	4.85	4.24	3.27	23.01	0.98	0.66	32.6	4.05	5.06	-24.9	5	5.25	-5
24	TZEEIOR 45 × TZEEIOR 9 A	5637.36	2543.12	54.89	48.39	47.65	1.53	49.09	48.7	0.8	0.75	2.51	-234.67	190.15	156.8	17.54	91.4	77.52	15.18	2.72	3.75	-38.01	0.91	0.57	37.43	3.72	5.76	-54.95	5	4.75	5
25	TZEEIOR 209 × TZEEIOR 9 A	6892.2	1337.7	80.59	49.89	49.9	-0.02	49.59	51.2	-3.24	0.25	1.26	-404	179.6	148.9	17.1	94.95	89.32	5.93	2.97	4	-34.81	1.07	0.7	34.54	3.72	6.26	-68.4	4.5	6.5	-44.44
26	TZEEIOR 221 × TZEEIOR 9 A	4973.15	653.19	86.87	51.13	50.5	1.24	51.85	54.36	-4.83	0.75	3.97	-429.33	170.75	135.04	20.91	83.22	76.13	8.52	3.01	3.25	-7.7	0.91	0.39	56.75	4.96	7.04	-42.16	3.75	7	-86.67
27	TZEEIOR 142 × TZEEIOR 9 A	5208.35	2312.23	55.61	52.73	49.93	5.31	52.74	51.11	3.08	0	1.74	-1.74	183.1	147.53	19.43	84.9	79.12	6.81	3.98	3.98	-0.04	0.89	0.69	22.54	4.93	6.02	-22.17	3.75	5.25	-40
28	TZEEIOR 381 × TZEEIOR 9 A	5008.63	1127.99	77.48	50.97	48.82	4.21	50.7	49.38	2.61	1.25	0.5	60	168.18	131.1	22.05	83.02	72.26	12.96	5.17	4.58	11.33	0.85	0.53	37.03	4.75	6.65	-39.9	5.5	6.25	-13.64
29	TZEEIOR 349 ×TZEEIOR 9 A	4716.99	1033.36	78.09	50.61	49.7	1.81	50.3	52.15	-3.68	0.25	2.3	-820	160.66	114.06	29.01	78	60.6	22.31	3.83	4.28	-11.67	0.86	0.63	26.5	5.02	6.57	-30.77	4.75	6	-26.32
30	TZEEIOR 536 × TZEEIOR 9 A	4884.47	1603.65	67.17	49.86	48.95	1.84	49.8	49.9	-0.2	0.5	0.8	-60	159.41	122.61	23.09	87.05	75.75	12.99	6.08	5.53	9.09	0.95	0.7	26.49	4.52	6.57	-45.22	4.5	5.75	-27.78
31	TZEEIOR 486 × TZEEIOR 9 A	5114.9	1247.4	75.61	49.11	47.71	2.86	49.49	49	1	0.5	1.24	-148	180	139.34	22.59	83.55	68.22	18.35	3.31	4.54	-37.04	0.8	0.57	28.35	4.24	6.27	-47.88	4.25	6.25	-47.06
32	TZEEIOR 526 × TZEEIOR 9 A	4347.03	1926.94	55.67	51.14	49.58	3.04	52.01	50.79	2.34	1	1.24	-24	159.36	130.61	18.04	74.57	65.38	12.33	3.01	4.5	-49.52	0.94	0.83	10.95	5.51	5.78	-4.95	5	5	0
33	TZEEIOR 525 × TZEEIOR 9 A	5371.22	1683.34	68.66	50.87	49.27	3.14	50.8	50.21	1.16	0.5	1.17	-134	172.17	129.33	24.88	78.51	69.1	11.98	3.28	4.3	-31.14	0.95	0.61	35.98	4.02	6.15	-53.05	5	6	-20
34	TZEEIOR 510 × TZEEIOR 9 A	5225.35	2046.81	60.83	49.86	49.48	0.78	49.83	49.33	1.02	0	0.28	-0.28	171.97	142.61	17.08	80.19	73.33	8.56	3.48	4.01	-15.43	0.88	0.81	7.67	5.52	5.2	5.69	5	5	0
35	TZEEIOR 546 × TZEEIOR 9 A	5253.2	2081.42	60.38	50.82	48.58	4.39	51.01	48.46	5	0.25	0.79	-216	174.09	149.01	14.4	78.37	76.58	2.29	3.53	5.12	-45.19	0.84	0.78	7.13	4.2	4.97	-18.5	5.5	5.5	0
36	TZEEIOR 305 × TZEEIOR 9 A	4068.18	1801.15	55.73	51.72	48.82	5.6	51.95	51.13	1.58	0.25	2.75	-1000	147.88	135.95	8.07	72.12	76.41	-5.95	4.67	5.08	-8.89	0.89	0.58	34.62	5.25	6.15	-17.06	5.75	6	-4.35
37	TZEEIOR 346 × TZEEIOR 97	4809.46	2067.77	57.01	52.12	51.83	0.55	52.14	55.13	-5.75	0	3.1	-3.1	186.79	134.87	27.79	87.75	74.45	15.15	4.72	4.84	-2.64	0.8	0.7	11.94	3.49	5.02	-43.78	4.5	5.5	-22.22
38	TZEEIOR 321 × TZEEIOR 97	6331.05	2690.14	57.51	50.72	50.69	0.05	50.05	51.11	-2.11	0.75	0.48	36	181.6	155.91	14.14	87.74	80.18	8.62	4.25	4.22	0.58	0.91	0.75	18.26	3.67	5.29	-44.33	5.25	4.25	19.05
39	TZEEIOR 314 × TZEEIOR 97	6993.1	3604.17	48.46	50.54	49.26	2.53	50.11	48.84	2.53	0.5	0.77	-54	186.79	155.31	16.85	88.27	77.28	12.45	6.72	6.06	9.84	0.96	0.93	3.22	5.23	5.51	-5.39	4.5	4.5	0
40	TZEEIOR 396 × TZEEIOR 97	5112.46	1820.7	64.39	52.39	52.63	-0.46	51.73	54.35	-5.06	0.75	1.74	-132	179.82	139.02	22.69	82	79.11	3.52	5.69	5.02	11.68	0.98	0.69	29.64	4.22	5.75	-36.22	5	5.5	-10
41	TZEEIOR 384 ×TZEEIOR 97	6101.5	2504.1	58.96	49.62	47.58	4.1	48.64	47.63	2.06	1.5	0.85	43.33	192.44	156.12	18.87	87.8	80.45	8.37	3.97	5.34	-34.65	0.99	0.72	27.05	3.74	5.02	-34.18	4.75	4.25	10.53
42	TZEEIOR 289 × TZEEIOR 97	7088.25	2098.93	70.39	50.96	51.29	-0.65	50.81	52.83	-3.97	0.5	2.21	-342	178.26	141.59	20.57	83.34	76.46	8.26	4.99	5.73	-14.86	0.93	0.73	20.96	4	5.83	-45.92	4.25	5.25	-23.53
43	TZEEIOR 365 × TZEEIOR 97	5795.26	2087.35	63.98	51.87	51.02	1.63	51.05	51.21	-0.31	0.75	0.92	-22.67	181.12	136.18	24.81	87.26	75.8	13.12	2.28	4.05	-77.67	0.94	0.63	33.17	4.02	5.9	-46.83	4.75	5.5	-15.79
44	TZEEIOR 290 × TZEEIOR 97	5915.99	1940.09	67.21	51.71	51.29	0.81	51.56	51.58	-0.04	0	0.96	-0.96	184.01	139.39	24.25	88.14	93.66	-6.26	6.49	5.73	11.69	0.91	0.63	30.83	5.5	5.83	-6.1	5.25	5	4.76
45	TZEEIOR 515 × TZEEIOR 97	6706.66	1884.32	71.9	51.1	50.49	1.18	51.16	50.88	0.56	0.5	0.5	0	182.89	140.81	23.01	82.56	73.21	11.32	3.27	3.68	-12.58	0.93	0.7	24.83	3.04	5.34	-75.88	5.25	5.25	0
46	TZEEIOR 458 × TZEEIOR 97	6607.95	2498.29	62.19	51.47	50.75	1.41	50.77	52.46	-3.33	1.25	1.94	-55.2	184.67	147.09	20.35	87.44	81.65	6.61	3.98	4.5	-13.06	0.95	0.65	31.19	3.51	5.39	-53.69	5.5	4.5	18.18
47	TZEEIOR 479 × TZEEIOR 97	5247.55	2857.75	45.54	50.21	48.94	2.52	48.52	48.59	-0.15	1.75	1	42.86	184.24	156.43	15.09	90.11	88.89	1.35	4.27	4.07	4.73	0.87	0.76	12.99	4.56	4.71	-3.36	4.5	4.5	0
48	TZEEIOR 513 × TZEEIOR 97	5986.77	2686.68	55.12	51.65	48.78	5.56	50.98	49.02	3.86	0.75	0.74	1.33	169.49	141.39	16.58	82.47	82.79	-0.38	4	4.51	-12.82	0.9	0.77	14.07	4.56	5.35	-17.48	4.5	4.75	-5.56
49	TZEEIOR 509 × TZEEIOR 97	6681.76	2248.02	66.36	51.22	50.91	0.6	50.95	50.97	-0.04	0.25	0.41	-64	180.84	140.85	22.11	92.01	81.74	11.17	4.25	4.55	-7.04	0.91	0.73	19.88	3.76	5.55	-47.67	4.75	5.25	-10.53
50	TZEEIOR 540 × TZEEIOR 97	7057.71	2717.56	61.5	51.04	49.94	2.15	50.03	50.58	-1.09	1	1.21	-21	195.3	155.86	20.19	90.59	83.46	7.87	5.48	4.73	13.6	0.96	0.81	15.55	3.21	4.87	-51.72	4.75	4.75	0
51	TZEEIOR 548 × TZEEIOR 97	5059.35	1626.13	67.86	52.54	51.88	1.24	52.43	53.99	-2.97	0	2.19	-2.19	178.51	130.77	26.74	81.01	70.65	12.78	4.44	4.81	-8.36	0.98	0.61	37.98	4.22	5.87	-39.23	4.75	5.75	-21.05
52	TZEEIOR 523 × TZEEIOR 97	6385.56	3054.03	52.17	51.1	49.36	3.41	50.51	49.65	1.7	0.5	0.78	-56	192.7	154.66	19.74	97.9	89.03	9.06	4.01	4.05	-1.06	0.96	0.84	12.41	3.95	4.32	-9.16	5	4.75	5
53	TZEEIOR 542 TZEEIOR 97	7304.07	2173.39	70.24	51.63	52.66	-2	51.97	53.96	-3.82	0.25	1.71	-584	192.2	129.66	32.54	90.41	72.48	19.83	4.51	5.28	-17.22	0.94	0.53	43.5	3.52	6.1	-73.41	3.25	5.25	-61.54
54	TZEEIOR 500 × TZEEIOR 97	6097.54	2762.46	54.7	51.17	48.18	5.86	51.32	48.9	4.71	0.5	0.75	-50	179.04	149.81	16.32	87.3	89.1	-2.05	4.23	4.68	-10.6	0.99	0.91	7.77	4.74	5.56	-17.25	5	5.25	-5
55	TZEEIOR 202 × TZEEIOR 97	6249	1758.75	71.86	52.17	51.43	1.43	52.57	54.4	-3.48	0.25	3.5	-1300	197.54	159.26	19.38	91.5	82.9	9.41	2.48	3.18	-28.15	1	0.73	26.92	3.49	5.06	-44.89	3.75	5	-33.33
56	TZEEIOR 205 × TZEEIOR 97	6735.32	2146.97	68.12	50.87	51.02	-0.3	52.05	52.96	-1.75	1.25	2.17	-73.6	209.47	159.68	23.77	110.06	94.65	13.99	4.53	4.3	5.04	0.94	0.54	42.07	3.27	5.65	-72.86	4.25	5.25	-23.53
57	TZEEIOR 24 × TZEEIOR 97	4392.24	2502.56	43.02	52.44	51.17	2.44	52.8	52.26	1.01	0.75	2.03	-170.67	198.23	167.74	15.38	95.86	91.3	4.76	4.75	2.79	41.17	0.98	0.72	26.32	4.46	5.55	-24.55	5	4.75	5
58	TZEEIOR 28 × TZEEIOR 97	3735.69	935.36	74.96	50.94	50.93	0.01	51.06	54.64	-7.01	0.5	3.76	-652	194.03	175.74	9.43	89.8	88.87	1.03	2.99	2.95	1.35	0.93	0.34	63.76	4.75	6.1	-28.21	4.5	6.25	-38.89
59	TZEEIOR 41 × TZEEEIOR 97	3675.55	1127.34	69.33	51.94	52.23	-0.56	52.77	54.91	-4.06	1	2.9	-190	190.95	154.41	19.13	90.17	84.59	6.19	4.76	3.29	30.91	0.78	0.51	34.45	5.75	6.1	-6.03	5.25	5.75	-9.52
60	TZEEIOR 45 × TZEEIOR 97	4374.19	974.87	77.71	52.37	51.62	1.44	52.39	55.01	-4.99	0.5	3.45	-590	195.33	149.56	23.43	91.75	81.44	11.24	2.93	2.81	3.86	0.85	0.5	40.99	4.49	5.75	-28.1	4.5	6.75	-50
61	TZEEIOR 209 × TZEEIOR 97	5573.76	1559.35	72.02	50.84	52.18	-2.64	51.07	54.53	-6.79	0.75	2.26	-201.33	191.56	154.33	19.43	96.89	88.73	8.41	3.23	4.22	-30.47	0.84	0.58	31.2	3.5	5.71	-63.32	4.25	5.75	-35.29
62	TZEEIOR 221 × TZEEIOR 97	5496.66	1367.15	75.13	53.26	51.31	3.66	53.57	54.19	-1.15	0.25	3.49	-1296	189.46	150.64	20.49	94.32	88.66	6	4.45	4.07	8.51	1.01	0.58	42.13	4.97	6.3	-26.57	5	5.75	-15
63	TZEEIOR 142 × TZEEIOR 97	5826.36	1870.73	67.89	53.83	53.44	0.74	55.17	55.97	-1.44	1.25	2.5	-100	197.77	152.02	23.13	95.51	84.53	11.5	4.69	4.56	2.83	0.89	0.59	33.73	4.22	5.92	-40.03	5.25	5.5	-4.76
64	TZEEIOR 381 × TZEEIOR 97	4832.9	2037.37	57.84	52.39	51.83	1.06	51.01	53.04	-3.99	1.25	1.24	0.8	171.06	125.71	26.51	80.97	71.33	11.91	5.01	5.75	-14.79	0.87	0.6	30.89	4.76	6.28	-32	5.25	5.75	-9.52
65	TZEEIOR 349 ×TZEEIOR 97	5131.68	1534.59	70.1	52.47	52.83	-0.68	52.04	54.55	-4.82	0.5	1.94	-288	184.31	121.07	34.31	93.38	65.91	29.41	3.5	4.75	-35.67	0.84	0.51	39.47	3.48	7.11	-104.46	5	5.75	-15
66	TZEEIOR 536 × TZEEIOR 97	6251.63	2211.03	64.63	51.64	51.23	0.8	51.68	52.77	-2.12	0.5	1.48	-196	188.42	135.35	28.17	100.27	83.94	16.29	4.73	5.77	-21.87	0.99	0.64	35.24	3.74	5.94	-58.89	4.5	4.75	-5.56
67	TZEEIOR 486 × TZEEIOR 97	6405.55	2136.38	66.65	51.9	51.29	1.18	52.17	52.84	-1.29	0.25	1.52	-508	190.89	143.46	24.85	91.33	80.08	12.32	3.25	4.25	-30.88	0.93	0.54	41.88	3.5	5.06	-44.64	4.5	5	-11.11
68	TZEEIOR 526 × TZEEIOR 97	6435.87	3318.75	48.43	50.62	49.18	2.84	51.17	50.14	2.02	1	1.82	-82	181.31	152.42	15.93	83.82	81.04	3.32	4.05	3.26	19.48	0.92	0.72	21.75	3.41	4.23	-24.14	4.75	3.75	21.05
69	TZEEIOR 525 × TZEEIOR 97	5985.97	1375.97	77.01	51.4	52.5	-2.14	51.66	55.08	-6.63	0.25	2.69	-976	184.65	115.9	37.23	83.95	65.62	21.83	2.97	5.04	-69.91	0.91	0.49	46.54	3.94	7.39	-87.5	4.75	5.75	-21.05
70	TZEEIOR 510 ×TZEEIOR 97	7379.62	3568.91	51.64	50.91	49.84	2.09	50.71	50.14	1.12	0.25	0.28	-12	203.5	161.44	20.67	102.37	90.34	11.75	3.52	3.63	-3.19	0.95	0.87	7.9	3.23	4.52	-39.79	4.5	3.75	16.67
71	TZEEIOR 546 × TZEEIOR 97	7426.78	2299.37	69.04	52	52.77	-1.48	51.35	54.9	-6.92	0.75	2.06	-174.67	192.1	129.27	32.71	85.7	70.38	17.88	3.99	5.12	-28.37	0.93	0.68	27.01	3.46	6	-73.48	3.5	5	-42.86
72	TZEEIOR 305 × TZEEIOR 97	6597.91	1459.64	77.88	51.84	52.75	-1.76	52.04	54.71	-5.14	0.75	2	-166.67	186.87	134.37	28.1	87.14	71.92	17.48	4.93	5.88	-19.29	0.91	0.55	39.76	3	6.69	-122.79	4.5	5.75	-27.78
73	TZEEIOR 346 × TZEEIOR 249	5105.66	2456.44	51.89	49.71	49.45	0.53	49.94	50.72	-1.56	0.25	1.94	-676	180.12	144.46	19.8	83.78	72.44	13.54	6.75	5.54	17.91	0.95	0.77	19.29	4.5	5.38	-19.73	5	5.25	-5
74	TZEEIOR 321 × TZEEIOR 249	4918.39	3207.81	34.78	49.61	46.23	6.8	50.2	46.79	6.8	0.5	0.54	-8	179.83	153.53	14.62	89.39	73.76	17.49	6.3	4.44	29.4	0.99	0.83	15.86	4.77	4.91	-2.97	5.25	3.25	38.1
75	TZEEIOR 314 × TZEEIOR 249	5476.2	2696.18	50.77	48.28	46.68	3.33	48.69	46.86	3.76	0.5	0.2	60	170.42	152.92	10.27	79.31	75.56	4.72	6.29	5.5	12.66	0.9	0.75	16.75	4.45	4.91	-10.35	4.75	4.25	10.53
76	TZEEIOR 396 × TZEEIOR 249	5721.09	2409.24	57.89	50.55	49.25	2.56	49.86	49.33	1.07	0.5	0.5	0	178.63	147.17	17.61	84.7	80.85	4.55	6.84	5.72	16.35	0.89	0.79	11.05	5.26	5.15	2.12	4.75	5.25	-10.53
77	TZEEIOR 384 ×TZEEIOR 249	5031.59	2115.28	57.96	50.66	48.8	3.67	50.46	48.82	3.24	0.25	0.19	24	178.72	151.04	15.49	86.4	77.52	10.27	4.99	5.04	-1.04	0.86	0.73	15	4.51	5.06	-12.08	4.25	5	-17.65
78	TZEEIOR 289 × TZEEIOR 249	5270.06	2235.42	57.58	50.26	48.83	2.85	50.18	48.78	2.78	0	1.01	-1.01	173.94	146.12	16	81.88	75.53	7.75	6.98	5.8	16.93	0.85	0.83	2.85	5.47	5.06	7.57	5	5.25	-5
79	TZEEIOR 365 × TZEEIOR 249	6060.89	2177.7	64.07	49.94	48.84	2.2	50.03	48.49	3.08	0	1.03	-1.03	179.83	148.44	17.45	88.21	84.95	3.7	4.97	2.83	42.98	0.97	0.72	25.45	4.52	5.01	-10.72	5	4.5	10
80	TZEEIOR 290 × TZEEIOR 249	5655.67	2601.6	54	50.79	48.68	4.16	50.73	49.98	1.48	0	1.95	-1.95	166.18	137.51	17.25	77.41	70.55	8.86	6.71	5.06	24.6	0.81	0.89	-9.74	5.29	5.29	0.01	4.75	5	-5.26
81	TZEEIOR 515 × TZEEIOR 249	6722.3	2917.19	56.6	49.41	46.24	6.4	48.49	46.22	4.68	1	0.48	52	187.55	174.62	6.89	83.3	79.15	4.98	5	4.76	4.86	0.98	0.8	18.31	3.92	3.96	-0.94	4.75	4.5	5.26
82	TZEEIOR 458 × TZEEIOR 249	5173.65	2494.72	51.78	50.5	49.52	1.94	50.1	49.4	1.4	0.5	0.31	38	171.85	140.62	18.17	74.95	74.48	0.63	6.49	5.62	13.38	0.9	0.83	7.91	5.46	5.25	3.85	5.5	4.5	18.18
83	TZEEIOR 479 × TZEEIOR 249	5521.17	2714.97	50.83	49.73	45.59	8.34	49.54	45.11	8.94	0.25	0.52	-108	177.46	166.71	6.06	83.66	85.94	-2.73	5.48	5.56	-1.39	0.93	0.88	5.69	5.02	4.62	7.88	4.75	4.75	0
84	TZEEIOR 513 × TZEEIOR 249	4932.61	2242.82	54.53	50.58	48.87	3.38	50.34	49.06	2.55	0.25	0.72	-188	164.53	144.38	12.25	73.32	69.48	5.24	5.73	5.31	7.39	0.94	0.84	10.42	5.01	5.93	-18.35	5	5	0
85	TZEEIOR 509 × TZEEIOR 249	5992.04	2602.56	56.57	51.08	48.42	5.22	50.94	49.18	3.46	0.25	0.6	-140	168.7	143.75	14.79	82.83	75.54	8.81	6.05	5.24	13.3	0.89	0.82	7.73	5.25	5.04	4	4.75	5.25	-10.53
86	TZEEIOR 540 × TZEEIOR 249	5818.24	2922.97	49.76	51.14	47.98	6.18	50.93	48.52	4.73	0.25	1.48	-492	175.67	168.6	4.02	79.77	88.89	-11.42	5.98	5.02	16.13	0.95	0.87	9.1	4.99	5.19	-4.05	4.75	4.25	10.53
87	TZEEIOR 548 × TZEEIOR 249	5753.19	1852.08	67.81	49.98	48.88	2.2	50.16	49.61	1.11	0.25	0.77	-208	176.52	139.89	20.75	82.48	68.76	16.63	5.75	5.12	10.93	0.81	0.74	8.15	5.02	5.05	-0.64	4.25	5	-17.65
88	TZEEIOR 523 × TZEEIOR 249	4603.36	2289.71	50.26	51.32	49.34	3.84	50.61	48.5	4.17	0.75	1.01	-34.67	169.21	145.83	13.81	82.85	81.34	1.81	6.75	5.54	17.96	0.91	0.72	20.98	5.81	5.48	5.66	4.5	4.75	-5.56
89	TZEEIOR 542 TZEEIOR 249	5331.58	2018.29	62.14	52.06	48.23	7.36	52.29	49.02	6.25	0.25	1.26	-404	183.86	156.07	15.12	79.76	77.91	2.31	5.2	4.45	14.4	0.94	0.62	34.57	5	4.85	2.96	4.75	5.25	-10.53
90	TZEEIOR 500 × TZEEIOR 249	6351.28	2146.55	66.2	48.88	47.83	2.15	47.57	47.92	-0.75	1.25	1.49	-19.2	181.68	152.84	15.87	89.24	84.02	5.86	6.28	5	20.38	0.98	0.72	27.03	4.81	5.41	-12.59	4.75	5.5	-15.79
91	TZEEIOR 202 × TZEEIOR 249	5941.13	1661.4	72.04	50.68	50.19	0.96	51.17	53.49	-4.53	0.5	3.28	-556	187.16	165.07	11.8	93.41	86.39	7.51	4.52	3.68	18.65	0.96	0.78	18.55	3.5	4.86	-38.72	4.5	5.25	-16.67
92	TZEEIOR 205 × TZEEIOR 249	5240.41	2558.98	51.17	51.47	49.47	3.89	52.74	51.65	2.07	1.25	2.21	-76.8	195.02	166.73	14.51	101.33	100.72	0.6	6.76	4.34	35.71	0.86	0.87	-1.06	5.02	4.67	6.94	4.75	5	-5.26
93	TZEEIOR 24 × TZEEIOR 249	4367.42	1988.74	54.46	51.89	50.92	1.86	53.47	52.51	1.78	1.5	1.29	14	191.11	157.49	17.59	89.35	81.36	8.94	4.99	3.59	28.05	0.9	0.78	12.99	5.31	5.37	-1.09	4.25	5.25	-23.53
94	TZEEIOR 28 × TZEEIOR 249	3907.16	1893.99	51.53	51.58	49.76	3.53	52.73	52.2	0.99	1.25	2.48	-98.4	196.95	169.11	14.13	84.63	80.16	5.28	4.98	3.76	24.44	0.81	0.7	14.12	5.53	5.16	6.76	4.5	5.75	-27.78
95	TZEEIOR 41 × TZEEEIOR 249	4813.1	1972.04	59.03	50.46	49.7	1.51	51.22	51.22	0	0.75	1.69	-125.33	188.9	171.19	9.37	81.34	84.45	-3.83	6.21	3.76	39.56	0.93	0.6	35.3	4.94	5.23	-5.84	4.5	5	-11.11
96	TZEEIOR 45 × TZEEIOR 249	4441.89	2127.52	52.1	50.68	48.47	4.36	51.99	50.12	3.6	1.25	1.54	-23.2	184.95	166.02	10.24	82.19	74.68	9.14	5.2	2.96	43.12	0.8	0.81	-1.68	5.24	5.18	1.16	4	5	-25
97	TZEEIOR 209 × TZEEIOR 249	4455.26	1919.1	56.93	51.22	49.5	3.37	51.77	50.71	2.05	0.5	1.44	-188	177.12	161.84	8.63	82.19	88.95	-8.23	5.23	4.5	13.95	0.93	0.85	9.24	5.26	4.89	6.98	4.75	5.5	-15.79
98	TZEEIOR 221 × TZEEIOR 249	5186.18	2156.96	58.41	51.03	50.93	0.2	51.05	52.49	-2.82	0	1.85	-1.85	191.66	151.35	21.03	91.81	80.04	12.81	4.43	3.47	21.71	0.94	0.85	10.24	4	5.32	-33.09	5.25	4.75	9.52
99	TZEEIOR 142 × TZEEIOR 249	6086.11	1680.12	72.39	51.47	51.34	0.25	51.36	53.32	-3.82	0.5	2.21	-342	194.24	145.53	25.07	94.69	81.51	13.92	6.26	4.23	32.44	0.93	0.7	24.84	4.81	4.74	1.46	5	5.5	-10
100	TZEEIOR 381 × TZEEIOR 249	4870.87	2170.14	55.45	50.41	48.51	3.77	49.94	49.35	1.18	0.5	2	-300	176.86	142.6	19.37	83.41	72.13	13.53	7	6.01	14.12	0.84	0.71	15.16	5.02	5.48	-9.34	5.5	5.5	0
101	TZEEIOR 349 ×TZEEIOR 249	5189.64	1915.2	63.1	49.96	49.7	0.53	49.69	50.22	-1.07	0.25	0.69	-176	179.67	133.46	25.72	81.88	69.29	15.38	4.75	5.04	-6.13	0.88	0.75	15.39	3.75	5.63	-50.38	5	5.5	-10
102	TZEEIOR 536 × TZEEIOR 249	6194.54	2340.93	62.21	50.34	48.95	2.74	50.09	49.14	1.9	0.25	0.54	-116	180.06	146.66	18.55	90	82.87	7.92	6.5	5.83	10.2	0.87	0.82	5.58	5.01	5.36	-6.99	4.5	4.75	-5.56
103	TZEEIOR 486 × TZEEIOR 249	6177.58	1845.42	70.13	50.27	49.81	0.9	50.54	51.36	-1.62	0.25	1.53	-512	176.6	144.1	18.4	76.78	73.52	4.25	5.01	4.2	16.25	0.92	0.63	31.54	4.54	5.47	-20.49	4.75	5.25	-10.53
104	TZEEIOR 526 × TZEEIOR 249	5800.14	2557.28	55.91	49.99	48.39	3.21	50.09	49.52	1.15	0	1.26	-1.26	171.92	153.58	10.67	75.59	69.65	7.86	3.76	3.71	1.52	0.88	0.76	13.68	4.17	5.01	-20.02	4.5	4.75	-5.56
105	TZEEIOR 525 × TZEEIOR 249	4570.43	2241.61	50.95	49.96	49.12	1.67	50.6	50.3	0.6	1	1.29	-29	178.26	147.16	17.44	77.35	75.49	2.4	4.01	4.69	-16.87	0.84	0.67	20.11	4.76	5.06	-6.34	4.75	5	-5.26
106	TZEEIOR 510 × TZEEIOR 249	5845.61	3294.78	43.64	51.39	48.16	6.29	50.99	49.05	3.8	0.25	0.99	-296	173.4	155.87	10.11	81.21	81.11	0.12	4.51	3.5	22.32	0.91	0.9	1.96	4.57	4.62	-1.19	5	3.75	25
107	TZEEIOR 546 × TZEEIOR 249	5713.03	1362.82	76.15	51.88	49.45	4.7	51.39	50.6	1.54	0.5	1.03	-106	176.84	146.18	17.34	77.5	75.71	2.31	6.02	5.32	11.66	0.87	0.68	22.45	4.78	5.97	-25.02	5	6	-20
108	TZEEIOR 305 × TZEEIOR 249	5426.58	2074.05	61.78	50.66	49.24	2.79	50.24	50.72	-0.96	0.5	1.48	-196	172.75	147.92	14.37	83.1	74.65	10.17	4.5	4.26	5.4	0.85	0.74	12.87	4.42	5.21	-17.8	4.5	5	-11.11
109	TZEEIOR 346 × TZEEIOR 197	6397.55	2438.1	61.89	49.72	49.03	1.37	49.39	49.72	-0.66	0.25	0.75	-200	181.61	155.56	14.35	88.04	78.59	10.74	2.52	3.45	-36.66	0.95	0.78	18.05	3.97	3.89	1.98	4.75	4.5	5.26
110	TZEEIOR 321 × TZEEIOR 197	5714.04	3116.3	45.46	49.58	46.67	5.88	49.69	48.18	3.04	0	1.35	-1.35	184	162.7	11.58	89.78	78.79	12.25	3.55	2.74	22.68	0.96	0.86	10.76	3.5	4.29	-22.57	4.75	3.75	21.05
111	TZEEIOR 314 × TZEEIOR 197	5529.33	2412.94	56.36	50.3	48.75	3.07	50.61	49.58	2.04	0.5	0.75	-50	175.33	143.72	18.03	80.35	77.5	3.55	3.09	3.47	-12.38	1.01	0.76	24.38	4.51	5.15	-14.15	4.75	4.75	0
112	TZEEIOR 396 × TZEEIOR 197	7437.02	2333.8	68.62	50.41	49.59	1.61	50.21	50.39	-0.36	0.25	0.78	-212	179.9	144.44	19.71	84.37	75.44	10.59	2.02	3.13	-55.05	0.99	0.78	20.72	3.23	5.52	-70.74	4.25	4.25	0
113	TZEEIOR 384 ×TZEEIOR 197	6825.93	1712.46	74.91	49.56	47.12	4.92	48.94	48.25	1.4	0.5	1	-100	178.1	149.07	16.3	81.29	72.45	10.88	2.81	3.93	-40.11	0.97	0.55	43.02	3.57	5.78	-61.92	4.75	5	-5.26
114	TZEEIOR 289 × TZEEIOR 197	7341.28	2873.28	60.86	50.45	49.15	2.58	50.61	51.24	-1.25	0.25	2.18	-772	179.96	151.33	15.91	80.63	74.56	7.53	3.02	2.74	8.97	0.99	0.86	13	3.47	4.9	-41.37	4.25	4.5	-5.88
115	TZEEIOR 365 × TZEEIOR 197	6360.64	2053.48	67.72	51.46	51.19	0.52	50.77	53.59	-5.56	0.75	2.25	-200	188.09	130.38	30.68	87.61	67.94	22.45	2.52	2.32	8	0.99	0.68	31.54	3.81	6.46	-69.62	4	5	-25
116	TZEEIOR 290 × TZEEIOR 197	7350.72	2257.64	69.29	49.61	48.71	1.83	49.99	50.25	-0.51	0.5	1.49	-198	181.55	145.64	19.78	84.05	70.92	15.63	2.31	3.79	-63.88	0.98	0.73	25.77	2.99	5.52	-84.58	4.5	5.25	-16.67
117	TZEEIOR 515 × TZEEIOR 197	6776.22	1756.67	74.08	50.28	49.25	2.04	49.89	50.14	-0.5	0.25	0.98	-292	200.38	154.02	23.14	92.52	81.01	12.44	2.53	2.79	-10.05	0.98	0.66	32.53	3.07	5.85	-90.82	4.25	6	-41.18
118	TZEEIOR 458 × TZEEIOR 197	7062.23	3642.91	48.42	49.1	47.37	3.52	49.38	47.68	3.44	0.25	0.25	0	191.4	160.91	15.93	84.56	78.26	7.45	2.29	2.31	-0.82	0.94	0.9	4.26	3.71	3.83	-3.19	3.75	4.25	-13.33
119	TZEEIOR 479 × TZEEIOR 197	6428.36	3073.8	52.18	50.21	48.21	3.99	49.42	48.36	2.14	0.75	0.71	5.33	182.79	158.75	13.15	82.97	77.74	6.31	2.03	3.24	-59.6	0.98	0.86	12.82	4.28	4.63	-8.12	4.25	4.25	0
120	TZEEIOR 513 × TZEEIOR 197	6953.46	2799.11	59.75	50.89	49.31	3.11	50.97	50.86	0.21	0.5	1.55	-210	189.13	155.66	17.69	87.49	76.82	12.2	2.73	2.24	17.86	0.97	0.8	17.91	3.76	5	-33.12	4.25	4.75	-11.76
121	TZEEIOR 509 × TZEEIOR 197	7454.93	4044.13	45.75	49.73	47.84	3.81	49.54	47.86	3.39	0.25	1.02	-308	186.56	161.06	13.67	85.66	76.99	10.12	2.23	3.31	-48.16	0.97	0.98	-0.71	2.77	4.37	-58.02	4.5	3.5	22.22
122	TZEEIOR 540 × TZEEIOR 197	6576.01	1948.14	70.38	51.39	48.74	5.16	51.39	49.92	2.85	0.5	1.01	-102	188.92	153.25	18.88	86.56	79.07	8.65	2.55	3.51	-37.4	1	0.74	26.18	4.08	5.59	-37.04	4	4.75	-18.75
123	TZEEIOR 548 × TZEEIOR 197	6213.41	2048.22	67.04	51.24	49.44	3.51	51.56	50.37	2.31	0.25	1.22	-388	175.75	144.51	17.78	77.03	72.87	5.41	2	2.99	-49.35	0.92	0.72	21.23	3.76	5.36	-42.35	4.25	5.5	-29.41
124	TZEEIOR 523 × TZEEIOR 197	6697.25	2258.81	66.27	50.61	47.88	5.39	50.87	48.74	4.2	0.75	0.58	22.67	182.4	150.45	17.52	88.94	79.19	10.97	2.52	2.86	-13.7	0.96	0.86	10.23	3.76	5.1	-35.76	3.75	5	-33.33
125	TZEEIOR 542 TZEEIOR 197	7187.5	1973.79	72.54	50.32	49.61	1.41	50.57	51.75	-2.34	0.25	2.02	-708	194.16	159.08	18.07	84.06	77.69	7.58	3.52	3.41	3.11	1	0.58	42.06	3.46	5.95	-71.98	4	5	-25
126	TZEEIOR 500 × TZEEIOR 197	5793.58	1649.88	71.52	49.6	48.69	1.83	49.7	49.28	0.84	0	1.04	-1.04	184.16	152.04	17.44	88.31	79.34	10.16	2.78	3.64	-31.17	0.95	0.62	35.29	4.95	5.74	-16.11	4.25	5.75	-35.29
127	TZEEIOR 202 × TZEEIOR 197	4232.97	1229.4	70.96	52.67	51.46	2.3	54.12	54.42	-0.56	1.5	2.81	-87.33	185.1	155.21	16.15	81.93	70.54	13.9	2	2.51	-25.34	0.91	0.62	32.25	4.79	6.32	-32.03	4.5	5.5	-22.22
128	TZEEIOR 205 × TZEEIOR 197	5989.75	2308.17	61.46	51.97	49.47	4.82	52.99	51.65	2.54	1	2.21	-121	190.92	173.53	9.11	91.83	94.17	-2.55	2.26	3.09	-37.06	0.95	0.83	12.7	3.52	4.92	-39.88	4.5	5.25	-16.67
129	TZEEIOR 24 × TZEEIOR 197	5364.96	1886.22	64.84	51.36	50.13	2.39	52.12	52.74	-1.18	0.75	2.33	-210.67	195.4	163	16.59	86.79	78.29	9.8	3.27	2.61	20.05	0.91	0.82	9.94	4.51	5.6	-24.26	4	5.25	-31.25
130	TZEEIOR 28 × TZEEIOR 197	4595.41	1430.01	68.88	51.03	50.04	1.94	51.84	52.08	-0.47	0.75	2.04	-172	185.86	156.07	16.03	82.19	68.88	16.19	2.22	2.3	-3.63	0.9	0.76	15.37	4.96	5.59	-12.61	4.25	5.75	-35.29
131	TZEEIOR 41 × TZEEEIOR 197	5130.07	2107.18	58.92	50.22	49.08	2.28	51.04	52.05	-1.98	0.75	3.19	-325.33	186.86	160.17	14.28	80.63	72.06	10.62	2.5	3	-19.97	0.92	0.77	15.82	4.23	4.86	-14.91	4	5	-25
132	TZEEIOR 45 × TZEE OR 197	5959.58	1410.69	76.33	49.98	49.72	0.52	50.29	51.11	-1.62	0.25	1.5	-500	190.77	140.92	26.13	82.75	62.47	24.51	2.5	3.23	-29.16	1.05	0.68	35.22	4	6.19	-54.72	4.5	5.75	-27.78
133	TZEEIOR 209 × TZEEIOR 197	6029.2	1313.55	78.21	50.85	50.5	0.68	50.99	52.75	-3.46	0.75	2.06	-174.67	191.03	142.93	25.18	91.83	74.92	18.41	2.53	2.94	-16.34	1.03	0.6	41.48	3.8	5.95	-56.27	4.5	5.5	-22.22
134	TZEEIOR 221 × TZEEIOR 197	6500.24	2029.28	68.78	50.24	49.98	0.51	50.87	52.35	-2.91	0.5	2.44	-388	190.37	160.04	15.93	85.94	82.96	3.47	2.2	2.79	-26.77	0.98	0.78	20.79	3.72	5.27	-41.92	5	5.5	-10
135	TZEEIOR 142 × TZEEIOR 197	5953.68	2578.45	56.69	52.51	48.62	7.41	53.78	52.67	2.07	1.25	4.02	-221.6	194.84	168.07	13.74	81.82	81.88	-0.06	2.22	2.76	-24.23	1.01	0.74	26.64	3.53	4.24	-20.03	5	4.5	10
136	TZEEIOR 381 × TZEEIOR 197	7060.27	2208.73	68.72	49.48	49.13	0.71	48.66	49.11	-0.91	0.75	0.52	30.67	181.32	154.84	14.6	80.73	79.96	0.95	3	3.37	-12.4	0.96	0.7	27.21	3.27	4.8	-46.81	4.5	5	-11.11
137	TZEEIOR 349 ×TZEEIOR 197	6032.11	1902.6	68.46	50.63	50.33	0.6	50.82	50.67	0.28	0.75	0.74	1.33	181.68	148.39	18.32	84.04	76.02	9.55	2.53	3.75	-48.22	0.97	0.7	28.22	4.31	5.66	-31.47	4	5.25	-31.25
138	TZEEIOR 536 × TZEEIOR 197	6464.66	2179.68	66.28	51.19	51.67	-0.92	52.05	54.76	-5.22	0.75	3.03	-304	177.63	138.84	21.84	84.61	78.75	6.93	2.25	3.04	-35.28	1.01	0.81	19.66	4.21	5.8	-37.89	4.75	4.75	0
139	TZEEIOR 486 × TZEEIOR 197	6175.33	1563.48	74.68	50.93	51.9	-1.91	52.42	55.07	-5.04	1.5	3.04	-102.67	180.38	148.58	17.63	84.35	80.56	4.49	2.31	2.35	-1.79	0.92	0.71	22.74	3.76	5.45	-44.95	4	5.5	-37.5
140	TZEEIOR 526 × TZEEIOR 197	6045.97	2077.97	65.63	50.89	49.98	1.8	52.07	52.21	-0.27	1.25	2.27	-81.6	173.64	145.21	16.37	76.59	75.26	1.74	2.71	3.5	-28.93	0.97	0.71	27.45	3.28	5.85	-78.58	4.5	5.25	-16.67
141	TZEEIOR 525 × TZEEIOR 197	6422.35	2299.27	64.2	50.32	49.58	1.46	51.26	50.46	1.56	1	1.29	-29	180.04	150.21	16.57	74.72	73.18	2.06	2.03	2.87	-41.63	0.97	0.64	33.52	3.7	4.97	-34.53	5.25	4.75	9.52
142	TZEEIOR 510 × TZEEIOR 197	7050.98	2628.79	62.72	50.4	49.44	1.9	51.19	50.82	0.73	0.75	1.24	-65.33	186.04	159.79	14.11	85.97	75.85	11.78	2.72	2.86	-5.16	0.98	0.87	11.21	3.76	4.57	-21.43	4.75	4.25	10.53
143	TZEEIOR 546 × TZEEIOR 197	6534.09	2540.66	61.12	51.47	51.86	-0.75	51.84	54.16	-4.48	0.5	2.26	-352	195.97	147.35	24.81	85.39	73.97	13.37	2.29	3	-31.28	0.97	0.89	8.17	2.99	4.79	-60.16	4	5	-25
144	TZEEIOR 305 × TZEEIOR 197	5885.05	2648.3	55	51.32	49.16	4.2	51.2	49.91	2.51	0.25	1.04	-316	169.44	154.67	8.72	76.53	81.39	-6.35	2.46	3.03	-23.57	1	0.75	24.95	4.77	5.21	-9.27	3.75	4.5	-20
145	TZEEIOR 346 × TZEEIOR 30	6123.53	2533.34	58.63	49.52	49.97	-0.92	48.5	50.36	-3.83	1	0.8	20	166.32	143.06	13.99	73.08	63.39	13.26	4.05	2.18	46.15	0.98	0.77	21.59	4.73	5.37	-13.35	5	5.25	-5
146	TZEEIOR 321 × TZEEIOR 30	5596.57	2401.44	57.09	49.97	47.84	4.26	48.61	46.82	3.68	1.25	0.71	43.2	166.49	154.48	7.21	76.09	76.16	-0.09	3.76	3.48	7.46	0.89	0.78	12.77	4.56	5.24	-14.89	5.5	4.75	13.64
147	TZEEIOR 314 × TZEEIOR 30	6132.9	2938.6	52.08	49.35	49.19	0.32	49.57	50.09	-1.06	0.75	0.6	20	161.92	144.47	10.78	76.42	71.91	5.9	3.71	4.27	-15.11	0.9	0.85	5.68	4.29	4.97	-16.05	4.75	4.25	10.53
148	TZEEIOR 396 × TZEEIOR 30	5356.03	1555.16	70.96	51.47	51.01	0.88	50.13	50.8	-1.35	1.25	0.46	63.2	160.15	129.92	18.88	70.39	62.32	11.47	2.76	3.48	-25.95	0.93	0.58	38.09	4.25	6.4	-50.47	3.75	5.75	-53.33
149	TZEEIOR 384 ×TZEEIOR 30	6752.58	3414.92	49.43	48.98	48.05	1.89	47.18	46.59	1.25	1.75	1.52	13.14	176.93	165.87	6.25	79.69	74.58	6.42	3	4.12	-37.31	0.95	0.81	14.56	3.96	4.21	-6.3	4.5	3.75	16.67
150	TZEEIOR 289 × TZEEIOR 30	6488.98	2471.75	61.91	49.32	49.46	-0.29	48.06	50.99	-6.09	1.25	2.19	-75.2	175.84	143.61	18.33	78.24	67.73	13.43	4.51	3.99	11.69	0.95	0.81	14.68	4.79	5.29	-10.55	4	5.25	-31.25
151	TZEEIOR 365 × TZEEIOR 30	6024.76	2367.76	60.7	49.79	50.34	-1.12	48.83	51.78	-6.05	1	2.3	-130	177.99	141.01	20.78	80.22	69.39	13.5	2.02	2.39	-18.54	0.94	0.76	19.39	4.3	5.25	-22.25	3.75	4.75	-26.67
152	TZEEIOR 305 × TZEEIOR 30	5676.38	2730.79	51.89	49.83	48.88	1.9	49.15	48.57	1.19	0.75	0.72	4	168	146.78	12.63	73.4	70.55	3.87	2.52	3.19	-26.73	0.93	0.79	14.64	4.5	5.09	-13.15	5.25	4.75	9.52
153	TZEEIOR 290 × TZEEIOR 30	6635.53	2467.47	62.81	49.67	49.08	1.18	48.27	50.01	-3.6	1.5	2.02	-34.67	179.15	152.04	15.13	81.49	71.37	12.42	3.95	4.26	-7.67	0.98	0.75	22.89	3.98	5.47	-37.45	4.25	5	-17.65
154	TZEEIOR 515 × TZEEIORV 30	6130.94	2096.38	65.81	48.86	47.95	1.87	47.55	48.4	-1.79	1.25	0.8	36	177.91	141.91	20.24	77.5	63.6	17.94	2.58	3.28	-26.99	0.97	0.78	19.11	4.27	4.82	-12.77	4.5	4.75	-5.56
155	TZEEIOR 458 × TZEEIOR 30	4535.2	2453.72	45.9	50.9	50.28	1.22	49.48	50.27	-1.58	1.5	0.99	34	168.79	139.24	17.51	77.32	70.79	8.45	3.25	2.76	14.97	0.86	0.83	3.09	5.31	5.1	3.84	4.5	4.75	-5.56
156	TZEEIOR 479 × TZEEIOR 30	5935.43	2305.94	61.15	49.71	48.46	2.52	48.17	48.11	0.12	1.5	0.21	86	171.49	138.45	19.27	79.97	67.99	14.99	2.53	2.99	-18.21	0.9	0.76	15.61	5.03	5.63	-11.88	4.75	5	-5.26
157	TZEEIOR 513 × TZEEIOR 30	5516.58	2425.89	56.03	48.52	48.88	-0.74	47.38	50.02	-5.58	1.25	1.06	15.2	166.59	132.14	20.68	76.02	63.31	16.71	2.97	3.2	-7.62	0.91	0.69	23.89	4.5	5.95	-32.24	4.5	4.75	-5.56
158	TZEEIOR 509 × TZEEIOR 30	5469.03	3096.97	43.37	49.51	47.98	3.07	48.86	48.15	1.45	0.75	1.78	-137.33	172.43	147.06	14.71	77.03	72.98	5.27	2.74	2.63	4.03	0.9	0.77	14.42	4.47	4.42	1.21	5.25	4.25	19.05
159	TZEEIOR 540 × TZEEIOR 30	7086.18	3261.14	53.98	49.28	48.75	1.06	48.14	48.39	-0.52	1	0.73	27	183.78	160.52	12.66	77.12	81.16	-5.23	3.03	4.29	-41.38	1	0.87	13.09	4.07	4.35	-7.04	3.75	3.5	6.67
160	TZEEIOR 548 × TZEEIOR 30	5776.17	2082.03	63.95	51.46	51.36	0.2	51.03	52.3	-2.49	0.5	0.97	-94	172.58	129.48	24.97	72.84	62.82	13.77	3.5	4	-14.04	0.95	0.67	29.57	4.96	5.68	-14.6	5.25	5	4.76
161	TZEEIOR 523 × TZEEIOR 30	6399.62	1860.33	70.93	49.85	49.49	0.74	49.12	50.75	-3.32	0.75	1.58	-110.67	181.73	144.19	20.66	88.3	74.52	15.61	4.24	3.42	19.39	0.97	0.8	16.96	5.19	6.11	-17.69	4.75	5.5	-15.79
162	TZEEIOR 542 × TZEEIOR 30	6594.61	2130.32	67.7	50.92	48.68	4.41	50.07	48.65	2.83	1	1	0	181.94	152.71	16.06	84.7	76.2	10.04	3.23	3.68	-13.88	0.89	0.61	30.89	4.49	4.56	-1.51	5	5.25	-5
163	TZEEIOR 500 × TZEEIOR 30	5231.78	1873.33	64.19	48.35	48.69	-0.71	46.95	50.03	-6.56	1.5	1.29	14	159.61	140.44	12.01	73.76	70.74	4.1	4.03	3.89	3.32	0.94	0.67	28.13	5.2	4.99	3.91	5	5.25	-5
164	TZEEIOR 202 × TZEEIOR 30	4917.55	2297.08	53.29	52.3	49.68	5.01	52.42	51.73	1.32	0	2.19	-2.19	185.27	170.68	7.87	82.03	89.19	-8.73	2.45	2.76	-12.58	0.93	0.82	11.78	5.21	4.36	16.39	5	4.5	10
165	TZEEIOR 205 × TZEEIOR 30	6279.68	2359.71	62.42	50.48	50.18	0.6	50.49	51.86	-2.73	0.5	1.74	-248	186	156.93	15.63	91.75	86.97	5.22	3.23	2.98	7.69	0.93	0.72	22.11	3.93	5.52	-40.54	4	5	-25
166	TZEEIOR 24 × TZEEIOR 30	2443.29	364.53	85.08	52.4	52.22	0.33	53.27	53.92	-1.22	0.75	1.52	-102.67	171.12	141.37	17.39	66.53	67.52	-1.48	2.02	4.48	-122.49	0.95	0.32	66.1	6.46	6.5	-0.59	5.5	6.5	-18.18
167	TZEEIOR 28 × TZEEIOR 30	1251.15	657.07	47.48	52.9	53	-0.19	54.16	55.58	-2.63	1.25	2.69	-115.2	176.7	149.2	15.56	68.25	61.17	10.37	3.22	3.54	-10.07	0.44	0.35	19.74	5.69	6.89	-21.09	6.25	6.5	-4
168	TZEEIOR 41 × TZEEEIOR 30	1824.96	198.22	89.14	52.16	53.8	-3.14	53.94	57.47	-6.54	1.75	3.58	-104.57	170.93	136.05	20.41	68.5	57.23	16.46	3	1.86	38.07	0.74	0.31	58.48	6.72	6.74	-0.3	5.5	7	-27.27
169	TZEEIOR 45 × TZEEIOR 30	1328.78	508.99	61.69	53.88	51.95	3.59	54.89	54.85	0.07	1	2.78	-178	164.89	143.78	12.8	64.75	61.11	5.63	3.27	3.32	-1.49	0.7	0.39	43.88	6.53	6.72	-2.99	5.5	7	-27.27
170	TZEEIOR 209 × TZEEIOR 30	4270.6	1926.02	54.9	51.7	50.9	1.55	51.36	52.24	-1.71	0.75	1.93	-157.33	175.71	152.48	13.22	80.93	74.96	7.37	2.77	2.74	0.74	0.92	0.69	24.13	4.97	5.65	-13.77	5	6	-20
171	TZEEIOR 221 × TZEEIOR 30	6031.58	1411.93	76.59	50.89	51.94	-2.06	50.7	54.51	-7.53	0.25	2.66	-964	182.48	145.01	20.53	83.94	69.92	16.7	2.49	2.8	-12.63	0.89	0.59	33.19	4.72	5.8	-22.9	4.75	5.5	-15.79
172	TZEEIOR 142 × TZEEIOR 30	6053.82	1705.87	71.82	53.06	50.87	4.13	53.44	54	-1.06	0.5	3	-500	194.85	154.77	20.57	87.84	79.55	9.44	3.81	2.68	29.52	0.95	0.61	35.29	4.32	5.53	-28.04	4.25	5.5	-29.41
173	TZEEIOR 381 × TZEEIOR 30	5897.69	2999.96	49.13	50.93	49.19	3.41	50.17	49.49	1.36	0.75	0.78	-4	169.51	158.92	6.25	77.21	80.24	-3.93	2.52	3.68	-45.81	0.89	0.7	21.65	5	4.61	7.89	5	5	0
174	TZEEIOR 349 ×TZEEIOR 30	5377.24	1479.28	72.49	50.29	50.83	-1.08	49.72	51.73	-4.05	0.5	0.75	-50	162.25	128.21	20.98	72.78	67.63	7.09	2.69	3.88	-44.08	0.97	0.64	33.64	5.04	6.55	-29.98	4	6	-50
175	TZEEIOR 536 × TZEEIOR 30	7390.22	3498.09	52.67	50.13	49.77	0.73	49.6	50.68	-2.17	0.5	2.63	-426	174.92	140.24	19.83	80.88	76.04	5.98	2.73	3.6	-31.59	0.99	0.75	24.19	4.26	5.25	-23.35	4.5	4.5	0
176	TZEEIOR 486 × TZEEIOR 30	4147.16	2335.76	43.68	51.54	49.62	3.73	51.86	51.13	1.39	0.25	1.33	-432	166.94	154.78	7.28	75.17	75.22	-0.06	2.74	3.56	-30.02	0.86	0.72	16.11	3.72	5.19	-39.76	5.25	5	4.76
177	TZEEIOR 526 × TZEEIOR 30	5912.97	2091.35	64.63	50.31	47.87	4.85	50.69	48.5	4.31	0.5	1	-100	167.45	141.37	15.58	72.34	68.1	5.86	2.56	2.18	14.62	0.89	0.61	31.39	4.82	5.53	-14.77	4.5	5	-11.11
178	TZEEIOR 525 × TZEEIOR 30	5617.52	3217.1	42.73	50.86	47.98	5.65	51.2	48.29	5.69	0.25	0.79	-216	172.58	156.38	9.39	72.39	68.16	5.85	2.55	2.69	-5.87	0.95	0.8	15.88	5.02	4.66	7.14	5	4.25	15
179	TZEEIOR 510 × TZEEIOR 30	6392.13	3805.47	40.47	50.11	49.23	1.74	50.45	50.54	-0.17	0.25	1.29	-416	175.63	147.43	16.06	79.79	69.56	12.82	2.55	1.94	23.6	0.97	0.91	6.05	5.02	4.16	17.1	5	3.25	35
180	TZEEIOR 546 × TZEEIOR 30	7249.23	2095.2	71.1	51.48	50.94	1.05	49.7	51.26	-3.15	1.75	0.27	84.57	178.65	144.33	19.21	107.09	71	33.7	4.3	3.22	25.1	0.9	0.78	12.75	3.77	4.92	-30.56	4	5	-25
181	CHECK 1 TZEEIOR 109 × TZdEEI 12	5271.48	2074.39	60.65	52.04	50.4	3.16	51.39	50.39	1.95	0.5	0.97	-94	178.55	134.38	24.74	88.84	78.79	11.32	2.76	3.8	-37.69	0.94	0.74	21.47	4.81	5.77	-20.05	4.25	5	-17.65
182	CHECK 2 - TZEEI 79 × TZEEI 82	4720.41	3015.16	36.13	48.57	45.22	6.89	49.13	47.28	3.76	0.5	1.86	-272	187.06	161.97	13.42	85.46	75.96	11.11	1.99	2.9	-45.79	0.95	0.84	11.49	3.78	4.41	-16.79	5	4.25	15
183	CHECK 3 - TZEEIY Pop STR C5 × TZEEI 58	5415.24	1645.14	69.62	48.35	46.86	3.08	47.76	48.15	-0.82	0.5	1.28	-156	200.4	166.51	16.91	88.4	87.38	1.16	2.26	2.55	-12.97	0.89	0.58	34.5	3.95	4.82	-21.81	4.75	5.25	-10.53
184	CHECH 4 - TZdEEI 1 × TZdEEI 5	4270.19	1929.81	54.81	49.15	47.29	3.79	48.67	47.34	2.73	0.5	0.52	-4	181.99	151.21	16.91	77.53	74.13	4.39	4.25	4.75	-11.85	0.93	0.75	19.67	5	5.56	-11.25	5.5	5.5	0
185	CHECK 5 - TZEEIOR 12 × TZEEIOR 223	5731.83	1113.66	80.57	51.05	50.55	0.99	51.77	53.79	-3.9	0.75	3.2	-326.67	178.19	136.77	23.24	92.95	78.51	15.53	4.76	3.71	22.1	0.95	0.37	61.25	4.01	6.05	-50.7	4.75	6.25	-31.58
186	CHECK 6 -TZdEEI 1 × TZdEEI 12	1566.51	1745.76	-11.44	52.58	52.76	-0.34	52.48	53.95	-2.81	0	1.23	-1.23	152.1	145.71	4.2	79.03	78.71	0.4	3.48	3.51	-0.98	0.88	0.8	9.33	6.53	5.66	13.38	4.5	5.5	-22.22
	MEAN	5596.16	2139.49	61.33	50.69	49.56	2.24	50.62	50.74	-0.22	0.62	1.5	-181.22	179.05	147.5	17.53	83.55	76.28	8.53	3.93	3.98	-6.88	0.92	0.71	22.67	4.43	5.43	-25.66	4.68	5.13	-10.74

## Sheet: Table S6
Table S6: Performance of parental inbred lines for grain yield and other agronomic parameters evaluated for two seasons under managed drought and rain-fed conditions
s/n	Inbred	Grain Yield (Kg/ha)			Days to Pollen			Days to Silking			Anthesis-Silking Interval			Plant Height			Ear Height			Husk Cover			Ears per Plant			Plant Aspect			Ear Aspect
		Rain-fed	Drought	Reduction (%)	Rain-fed	Drought	Reduction (%)	Rain-fed	Drought	Reduction (%)	Rain-fed	Drought	Reduction (%)	Rain-fed	Drought	Reduction (%)	Rain-fed	Drought	Reduction (%)	Rain-fed	Drought	Reduction (%)	Rain-fed	Drought	Reduction (%)	Rain-fed	Drought	Reduction (%)	Rain-fed	Drought	Reduction (%)
1	TZEEIOR 289	1502.61	579.74	61.42	52.62	55.96	-6.35	52.11	56.07	-7.61	0.5	0.52	-3.18	92.68	73.76	20.42	34.14	31.46	7.85	4	4.07	-1.66	0.98	0.74	24.42	5.2	5.94	-14.21	4.27	5.4	-26.39
2	TZEEIOR 290	1348.99	720.24	46.61	53.94	52.96	1.81	53.4	54.55	-2.16	0.49	1.51	-208.08	92.08	74.09	19.54	37.48	31.3	16.49	5.26	4.54	13.58	0.82	0.87	-5.58	5.76	5.51	4.27	4.97	4.74	4.76
3	TZEEIOR 305	1364.16	426.51	68.73	55.56	55.14	0.76	54.3	56.56	-4.17	1.25	1.26	-1.01	96.42	77.2	19.94	45.28	37.93	16.23	3.28	4.01	-22.28	0.72	0.42	40.99	5.65	5.43	3.96	4.3	4.87	-13.19
4	TZEEIOR 314	1654.7	771.75	53.36	53.4	51.61	3.35	53.37	52.51	1.6	0.49	1.76	-258.97	109.45	93.52	14.56	40.5	41.19	-1.71	3.72	4.11	-10.46	0.95	0.66	30.32	4.26	5.06	-18.87	5.33	4.25	20.27
5	TZEEIOR 321	2263.5	791.1	65.05	51.34	50.33	1.97	50.32	49.87	0.9	1	1.52	-51.82	114.45	93.39	18.4	48.71	46.07	5.42	4.52	4.34	4.03	0.87	0.47	46.35	4.07	4.3	-5.67	4.04	4.52	-11.89
6	TZEEIOR 346	1074.81	511.95	52.37	49.45	49.64	-0.38	48.47	49.42	-1.97	1.03	0.99	4.49	112.4	84.79	24.56	48.33	42.21	12.65	4.02	4.65	-15.57	0.55	0.48	13.15	4.29	5.25	-22.6	4.88	5.34	-9.38
7	TZEEIOR 365	1763.84	513.79	70.87	55.45	56.7	-2.26	54.85	57.63	-5.07	0.49	0.77	-56.6	116.34	65.2	43.96	46.75	35.44	24.18	3.99	4.07	-1.88	0.84	0.45	46.39	4.18	6.79	-62.42	4.82	6.49	-34.77
8	TZEEIOR 384	1518.71	543.58	64.21	54.36	53.05	2.41	53.8	54.09	-0.54	0.5	2.48	-400.87	97.11	75.52	22.23	38.66	36.97	4.38	4.3	4.11	4.42	0.85	0.49	42.86	4.23	6.65	-57.08	5.38	6.45	-19.89
9	TZEEIOR 396	2665.03	544.76	79.56	54.81	56.9	-3.81	53.55	57.42	-7.23	1.29	0.98	24.2	103.77	78.87	24	44.21	43.14	2.42	4.49	3.62	19.53	0.89	0.49	44.4	3.59	5.49	-52.83	4.07	5.31	-30.37
10	TZEEIOR 458	2711.16	945.06	65.14	52.54	52.02	0.99	52	52.27	-0.52	0.51	0.51	-1.43	116.2	82.94	28.62	50.75	43.31	14.66	3.53	3.52	0.11	1.1	0.72	33.96	3.22	5.42	-68.03	5.19	4.28	17.45
11	TZEEIOR 479	2060.92	768.95	62.69	50.76	48.41	4.63	49.56	46.76	5.65	1.27	1.76	-39.06	110.84	91.06	17.85	47.09	46.92	0.36	2.53	2.96	-17.11	1.23	0.8	34.43	3.64	4.03	-10.68	4.28	4.65	-8.78
12	TZEEIOR 500	2372.1	432.65	81.76	49.78	49.65	0.26	48.76	50.39	-3.36	1.01	1.52	-50.49	120.46	81.9	32.01	50.78	40.25	20.73	3.47	3.71	-6.9	1.03	0.42	59.04	3.78	6.19	-63.93	3.46	5.86	-69.25
13	TZEEIOR 513	3757.34	858.08	77.16	50.9	49.38	2.99	50.17	48.29	3.75	0.74	1.28	-74.33	114.51	83.55	27.04	42.41	39.6	6.63	2.47	2.86	-15.96	1.31	0.83	36.83	2.24	4.78	-113.7	3.04	4.83	-58.95
14	TZEEIOR 515	1568.11	899.52	42.64	51.31	49.5	3.53	50.84	49.43	2.77	0.49	0.25	48.43	115.72	87.11	24.72	40.62	30.7	24.42	2.27	3.58	-57.39	0.94	0.54	41.9	3.81	6.2	-63.01	3.84	5.54	-44.08
15	TZEEIOR 523	3004.22	1132.02	62.32	53.55	51.66	3.53	53.02	52.19	1.56	0.5	0.28	44.24	115.03	87.76	23.71	56.32	48.7	13.53	3.03	3.09	-1.79	1.23	0.97	21.16	2.74	4.08	-48.61	3.05	4.39	-44.09
16	TZEEIOR 540	2543.48	1409.5	44.58	52.46	51.51	1.81	51.81	50.94	1.67	0.77	0.5	35.07	128.86	92.61	28.13	52.51	41.65	20.69	1.99	3.55	-77.79	0.93	0.74	20.5	3.28	4.6	-40.18	4.14	4.72	-13.98
17	TZEEIOR 542	2213.64	887.11	59.93	59.89	57.31	4.3	59.93	57.5	4.05	0.98	0.03	96.81	142.82	70.28	50.79	54.09	36.46	32.6	2.73	4.05	-48.51	1.17	0.62	47.14	2.45	5.82	-137.77	4.25	5.72	-34.54
18	TZEEIOR 548	2545.8	691.45	72.84	53.26	51.58	3.17	53.08	51.37	3.24	0.27	0.77	-181.83	103.96	74.64	28.2	40.31	33.67	16.48	2.25	3.59	-59.55	0.92	0.61	34.08	2.93	4.05	-38.2	2.97	5.02	-68.83
19	TZEEIOR 249	1957.59	306.07	84.37	56.49	57.3	-1.43	57.75	56.01	3.02	1.27	1.24	2.35	139.05	96.28	30.76	62.1	47.62	23.32	4.02	3.62	9.85	0.81	0.5	38.69	3.11	4.83	-55.25	3.68	6.13	-66.56
20	TZEEIOR 123	1350.68	584.93	56.69	57.02	55.97	1.84	57.79	55.07	4.71	0.77	2.03	-162.19	101.36	84.82	16.32	39.9	43.04	-7.87	2.98	3.39	-13.79	0.74	0.92	-23.68	3.75	5.49	-46.55	5.06	5.08	-0.4
21	TZEEIOR 24	1633.3	288.37	82.34	55.42	57.44	-3.64	55.36	58.58	-5.83	1.04	1.24	-20.14	121.38	81.53	32.83	48.26	38.86	19.48	3.53	2.63	25.57	0.77	0.28	63.91	4.73	5.59	-18.07	4.37	7.29	-66.81
22	TZEEIOR 197	2157.79	908.42	57.9	54.45	53.8	1.19	56.97	54.83	3.76	2.5	1.23	50.87	130.13	105.84	18.66	48.65	49.2	-1.13	2.75	2.28	16.96	0.87	0.78	10.21	2.94	4.65	-57.9	3.27	4.83	-47.75
23	TZEEIOR 45	1971.51	472.41	76.04	56.29	52.64	6.48	57.78	54.91	4.97	1.55	2.23	-43.74	142.26	109.83	22.8	54.96	53.86	1.99	3.28	2.2	32.87	0.9	0.38	58.2	3.32	5.01	-51.22	3.82	6.25	-63.51
24	TZEEIOR 221	2565.91	297.9	88.39	56.2	55.23	1.72	56.98	57.75	-1.34	0.74	2.52	-239.88	130.57	91.58	29.86	54.07	50.95	5.78	3	2.88	3.97	0.93	0.38	58.94	2.57	5.12	-98.95	3.04	7.12	-133.74
25	TZEEIOR 125	1103.01	379.13	65.63	60.02	58.47	2.58	61.04	59.07	3.23	1.02	0.53	48.36	119.66	93.42	21.93	45.9	44.49	3.07	3.98	3.14	21.12	0.65	0.75	-14.77	3.75	4.99	-33.21	6.31	7.08	-12.21
26	TZEEIOR 97	2830.52	388.03	86.29	58.28	59.71	-2.45	59.32	62.13	-4.73	0.99	2.3	-130.84	139.14	90.14	35.21	55.61	41.05	26.17	3.48	3.06	11.88	1.05	0.3	71.24	3.27	4.93	-50.54	3.08	5.92	-92.02
27	TZEEIOR 202	1375.66	202.99	85.24	56.04	55.43	1.1	57.74	59.89	-3.73	1.73	4.27	-146.95	138.25	105.16	23.94	48.84	47.85	2.04	2.75	2.1	23.47	0.73	0.38	47.69	4.2	5.04	-20.21	5.06	6.67	-31.72
28	TZEEIOR 205	2716.19	302.1	88.88	54.15	55.09	-1.73	55.7	57.69	-3.58	1.46	2.73	-86.65	133.74	100.01	25.22	64.44	57.66	10.52	4.73	3.35	29.22	0.81	0.49	39.61	2.99	5.46	-82.42	2.75	6.93	-151.8
29	TZEEIOR 209	2547.67	363.73	85.72	55.03	54.98	0.09	54.67	57.69	-5.52	0.24	2.74	-1025.04	133.28	100.24	24.79	59.31	51.15	13.75	3.51	2.45	30.06	0.89	0.55	37.93	3.84	5.31	-38.22	3.94	5.77	-46.59
30	TZEEIOR 525	1449.3	373.34	74.24	53.41	52	2.64	54	52.27	3.21	0.49	0.75	-54.04	106.84	76.23	28.65	37.3	33.84	9.27	2.5	4	-60.31	0.67	0.47	30.2	4.34	6.17	-42.27	4.96	4.89	1.35
31	TZEEIOR 526	1843.73	535.15	70.97	53	51.61	2.62	54.08	51.6	4.58	1.04	0.72	30.79	93.61	71.2	23.93	35.88	32.04	10.72	2.76	3.16	-14.5	0.85	0.64	25.22	4.43	6.2	-39.98	3.96	5.1	-28.59
32	TZEEIOR 486	3288.41	591.32	82.02	53.87	53.56	0.57	54.63	55.62	-1.8	0.73	2.02	-176.87	104.6	79.33	24.16	47.16	40	15.18	2.99	3.24	-8.33	0.9	0.46	48.56	3.2	5.32	-66.31	3.27	4.9	-50.03
33	TZEEIOR 536	1683.87	650.88	61.35	56.28	57.34	-1.89	57.25	58.36	-1.94	0.99	1.02	-2.68	104.33	70.62	32.31	49.27	42.4	13.94	3.74	4.45	-19.24	0.85	0.76	10.03	4.43	6.82	-53.74	4.02	5.72	-42.36
34	TZEEIOR 510	3022.7	1069.9	64.6	54.32	55.48	-2.14	56.11	56.79	-1.22	1.72	1.26	26.65	116.47	90.57	22.24	42.48	44.79	-5.42	2.25	2.8	-24.47	1.05	0.76	27.53	2.61	5.03	-92.97	3.36	4.7	-39.94
35	TZEEIOR 349	2025.93	351.44	82.65	54.24	55.69	-2.67	54.72	58.58	-7.07	0.44	2.99	-585.06	113.7	72.23	36.48	58.09	35.46	38.96	2.77	5.38	-94.28	0.96	0.33	65.71	3.7	7.34	-98.16	4.63	6.29	-35.69
36	TZEEIOR 381	1308.2	416.89	68.13	56.08	53.8	4.06	55.15	55.8	-1.17	0.98	2.48	-153.89	95.31	68.06	28.59	38.15	37.04	2.9	5.49	5.29	3.58	0.64	0.38	40.71	5.39	6.65	-23.4	4.9	5.85	-19.38
37	TZEEIOR 142	1937.78	505.61	73.91	58.97	58.4	0.98	59.42	59.34	0.13	0.48	0.98	-104.02	124.87	80.5	35.53	45.91	41.55	9.5	3.24	2.94	9.16	0.76	0.58	23.26	4.27	5.79	-35.76	5.02	6.17	-22.81
38	TZEEIOR 9A	NA	NA	NA	NA	NA	NA	NA	NA	NA	NA	NA	NA	NA	NA	NA	NA	NA	NA	NA	NA	NA	NA	NA	NA	NA	NA	NA	NA	NA	NA
39	TZEEIOR 30	NA	NA	NA	NA	NA	NA	NA	NA	NA	NA	NA	NA	NA	NA	NA	NA	NA	NA	NA	NA	NA	NA	NA	NA	NA	NA	NA	NA	NA	NA
40	TZEEIOR 41	1604.01	0	109.24	54.5	55.68	-2.17	56.56	59.33	-4.9	2.04	3.52	-72.88	136.09	96.6	29.01	50.72	44.34	12.58	3.99	1.61	59.53	0.87	0.19	78.75	4.87	5.14	-5.65	5.21	7.15	-37.41
41	TZEEIOR 28	703.83	119.24	83.06	55.11	58.58	-6.29	55.81	60.65	-8.67	1.2	1.8	-49.38	146.87	101.32	31.01	54.95	41.1	25.2	3.23	2.68	16.94	0.58	0.07	87.69	4.04	6.9	-70.85	6.1	8.44	-38.18
	MEAN	2025.92	577.84	70.74	54.48	54.14	0.62	54.67	55.11	-0.8	0.95	1.52	-101.79	117.3	85.48	26.74	47.72	41.67	12	3.41	3.46	-6.05	0.89	0.56	36.87	3.82	5.47	-48.49	4.26	5.66	-37.74

## Sheet: Figure S1
Figure S1 : Rainfall pattern at Ikenne during drought trials evaluation from December 2021 to March 2022 and from November 2022 to February 2023

## Sheet: Figure S2
Figure S2: Monthly temperature at Ikenne during drought trials evaluation from December 2021 to March 2022 and from November 2022 to February 2023
